# Supplementary material for: Metabolic Profiling and Integration of Metabolomic and Transcriptomic Data From Pectoralis Muscle Reveal Winter-Adaptive Metabolic Responses of Black-Capped Chickadee and American Goldfinch
Source: Frontiers journal article supplement (doi:10.3389/fevo.2022.866130), 2022-04-12
Supplement: Table_1.xlsx [file Table_1.xlsx]

## Sheet: fold_changeBCCH
Table 1. Metabolites with greater than twofold increase in the black-capped chickadee (Winter compared to Summer).
Metabolite Name	Fold Change	log2(FC)
docosapentaenoylcarnitine (C22:5n3)*	50.473	5.6574
linolenoyl-linolenoyl-glycerol (18:3/18:3) [2]*	31.547	4.9794
alpha-tocopherol	0.04773	-4.389
margaroylcarnitine*	18.875	4.2384
palmitoyl-linolenoyl-glycerol (16:0/18:3) [2]*	18.106	4.1784
linolenoylcarnitine (C18:3)*	17.231	4.1069
dopamine 3-O-sulfate	14.401	3.8481
glutarylcarnitine (C5-DC)	13.934	3.8005
tetracosadienoylcarnitine (C24:2)*	0.07861	-3.6691
N-delta-acetylornithine	12.243	3.6139
N-linolenoyltaurine *	12.143	3.602
docosadienoate (22:2n6)	0.084468	-3.5654
tryptophan betaine	0.084725	-3.5611
oleoyl-linolenoyl-glycerol (18:1/18:3) [2]*	11.46	3.5185
1-linolenoyl-GPC (18:3)*	11.043	3.4651
palmitoyl-palmitoyl-glycerol (16:0/16:0) [2]*	10.734	3.4242
pyrraline	0.098512	-3.3436
inositol 1-phosphate (I1P)	9.2975	3.2168
docosapentaenoate (n6 DPA; 22:5n6)	0.12191	-3.0361
N-myristoyl-sphingosine (d18:1/14:0)*	8.1297	3.0232
erucoylcarnitine (C22:1)*	0.12459	-3.0048
1-linolenoylglycerol (18:3)	8.0262	3.0047
palmitoylcarnitine (C16)	7.698	2.9445
mannitol/sorbitol	7.6704	2.9393
erucate (22:1n9)	0.13939	-2.8428
N-methylproline	7.1185	2.8316
linoleoyl-linolenoyl-glycerol (18:2/18:3) [2]*	6.7223	2.7489
isobutyrylcarnitine (C4)	6.2774	2.6502
1-linoleoyl-GPI (18:2)*	0.16386	-2.6095
maltitol	6.0513	2.5972
linolenate [alpha or gamma; (18:3n3 or 6)]	5.9805	2.5803
2-myristoylglycerol (14:0)	5.9697	2.5777
uracil	5.7685	2.5282
1-palmitoyl-2-alpha-linolenoyl-GPC (16:0/18:3n3)*	5.7248	2.5172
2-methylbutyrylcarnitine (C5)	5.6666	2.5025
myristoylcarnitine (C14)	5.6001	2.4854
phosphopantetheine	0.17857	-2.4854
dihomo-linolenoylcarnitine (20:3n3 or 6)*	5.5279	2.4667
methylsuccinate	5.4724	2.4522
docosadienoylcarnitine (C22:2)*	0.18664	-2.4216
17-methylstearate	5.2994	2.4058
homostachydrine*	0.19438	-2.363
1-oleoyl-2-linoleoyl-GPC (18:1/18:2)*	0.19506	-2.358
eicosapentaenoate (EPA; 20:5n3)	5.083	2.3457
palmitoleoyl-linoleoyl-glycerol (16:1/18:2) [1]*	5.0068	2.3239
1-palmitoleoyl-2-linolenoyl-GPC (16:1/18:3)*	5.0034	2.3229
valylleucine	0.20302	-2.3003
1-oleoyl-2-linoleoyl-GPE (18:1/18:2)*	0.20823	-2.2637
sphingomyelin (d18:1/15:0, d16:1/17:0)*	4.802	2.2636
nervonate (24:1n9)*	0.21174	-2.2396
1-methylhistamine	4.6801	2.2265
tiglylcarnitine (C5:1-DC)	4.5254	2.178
docosahexaenoylcarnitine (C22:6)*	4.4237	2.1453
ceramide (d18:1/17:0, d17:1/18:0)*	4.1586	2.0561
sphingomyelin (d18:1/19:0, d19:1/18:0)*	4.1572	2.0556
1-linoleoyl-GPC (18:2)	0.2407	-2.0547
1-(1-enyl-oleoyl)-GPE (P-18:1)*	0.24195	-2.0472
sphingomyelin (d18:1/14:0, d16:1/16:0)*	4.1214	2.0431
behenate (22:0)*	0.24328	-2.0393
sphingomyelin (d18:1/25:0, d19:0/24:1, d20:1/23:0, d19:1/24:0)*	4.092	2.0328
sphingomyelin (d18:1/17:0, d17:1/18:0, d19:1/16:0)	4.0574	2.0205
1-linoleoyl-GPE (18:2)*	0.24831	-2.0098
homocitrulline	3.9681	1.9884
pseudouridine	3.9648	1.9873
1-(1-enyl-oleoyl)-2-linoleoyl-GPE (P-18:1/18:2)*	0.25697	-1.9603
1-palmitoyl-2-palmitoleoyl-GPC (16:0/16:1)*	3.8874	1.9588
4-cholesten-3-one	3.8331	1.9385
eicosenoate (20:1)	0.26358	-1.9237
adrenoylcarnitine (C22:4)*	3.7795	1.9182
dihomo-linolenoyl-choline	3.7574	1.9097
1,2-dipalmitoyl-GPC (16:0/16:0)	3.7292	1.8989
palmitoylcholine	3.7282	1.8985
1-myristoylglycerol (14:0)	3.7162	1.8938
methionine sulfone	3.7078	1.8906
dihomo-linolenate (20:3n3 or n6)	0.27435	-1.8659
beta-guanidinopropanoate	3.63	1.86
oleoyl-arachidonoyl-glycerol (18:1/20:4) [2]*	3.609	1.8516
1-oleoyl-GPC (18:1)	0.27816	-1.846
1-stearoyl-GPG (18:0)	0.28181	-1.8272
1-linoleoyl-GPG (18:2)*	0.28977	-1.787
dihomo-linoleate (20:2n6)	0.29458	-1.7633
1-stearoyl-2-arachidonoyl-GPS (18:0/20:4)	3.3861	1.7596
arachidonoylcarnitine (C20:4)	3.3645	1.7504
5-(galactosylhydroxy)-L-lysine	3.3301	1.7356
1-oleoyl-GPG (18:1)*	0.30102	-1.7321
2'-deoxycytidine	3.2933	1.7195
trigonelline (N'-methylnicotinate)	3.2704	1.7095
2-palmitoleoylglycerol (16:1)*	3.2604	1.7051
oleoyl-linoleoyl-glycerol (18:1/18:2) [1]	0.30868	-1.6958
15-methylpalmitate	3.2016	1.6788
allantoin	3.185	1.6713
1,2-dipalmitoyl-GPE (16:0/16:0)*	3.1733	1.666
alanylleucine	0.31538	-1.6649
gamma-glutamylvaline	3.1007	1.6326
1-aminocyclopropanecarboxylic acid	3.0941	1.6295
valylglycine	0.32397	-1.6261
beta-citrylglutamate	3.0823	1.624
3-methylcytidine	3.0439	1.6059
10-heptadecenoate (17:1n7)	3.0342	1.6013
1-oleoylglycerol (18:1)	0.33074	-1.5962
palmitoyl-oleoyl-glycerol (16:0/18:1) [1]*	2.9866	1.5785
oleoyl-linoleoyl-glycerol (18:1/18:2) [2]	0.34366	-1.541
trans-4-hydroxyproline	2.9031	1.5376
1-arachidonoyl-GPC (20:4n6)*	0.34482	-1.5361
1-oleoyl-GPE (18:1)	0.34852	-1.5207
1-stearoyl-2-linoleoyl-GPI (18:0/18:2)	0.35119	-1.5097
diacylglycerol (16:1/18:2 [2], 16:0/18:3 [1])*	2.8363	1.504
N-oleoyltaurine	0.35305	-1.5021
oleoyl ethanolamide	0.35383	-1.4989
ergothioneine	0.35444	-1.4964
sphingomyelin (d18:1/21:0, d17:1/22:0, d16:1/23:0)*	2.8045	1.4877
saccharopine	2.7771	1.4736
stearoylcarnitine (C18)	2.7719	1.4709
serotonin	0.36154	-1.4678
N-acetylputrescine	2.7571	1.4632
docosapentaenoate (n3 DPA; 22:5n3)	2.7514	1.4601
2-oleoylglycerol (18:1)	0.36641	-1.4485
phosphoenolpyruvate (PEP)	2.7064	1.4364
nonadecanoate (19:0)	2.6931	1.4293
phenylalanylalanine	0.37228	-1.4255
N-monomethylarginine	2.6811	1.4228
N-palmitoyl-sphingosine (d18:1/16:0)	2.641	1.4011
cytosine	0.37999	-1.396
1-stearoyl-2-linoleoyl-GPG (18:0/18:2)*	0.38038	-1.3945
1-(1-enyl-stearoyl)-2-arachidonoyl-GPE (P-18:0/20:4)*	2.6197	1.3894
N2,N2-dimethylguanosine	2.5855	1.3705
dimethylarginine (SDMA + ADMA)	2.5779	1.3662
1-(1-enyl-palmitoyl)-2-palmitoyl-GPC (P-16:0/16:0)*	2.5769	1.3656
phenylalanylglycine	0.39155	-1.3527
threonylphenylalanine	0.39794	-1.3294
N-erucoyl-sphingosine (d18:1/22:1)*	2.512	1.3289
S-adenosylhomocysteine (SAH)	0.39821	-1.3284
oleoyl-arachidonoyl-glycerol (18:1/20:4) [1]*	0.39839	-1.3277
1-lignoceroyl-GPC (24:0)	0.40222	-1.3139
creatine phosphate	2.4714	1.3053
1,2-dilinoleoyl-GPC (18:2/18:2)	0.40665	-1.2981
4-HDoHE	2.4302	1.2811
1-(1-enyl-palmitoyl)-2-linoleoyl-GPC (P-16:0/18:2)*	0.41166	-1.2805
3-phosphoglycerate	2.4291	1.2804
1-linoleoylglycerol (18:2)	0.4134	-1.2744
1-arachidonoyl-GPE (20:4n6)*	0.41588	-1.2658
valylglutamine	0.41649	-1.2636
4-guanidinobutanoate	2.3986	1.2622
sphinganine	2.384	1.2534
glycosyl-N-arachidoyl-sphingosine (d18:1/20:0)*	2.3718	1.246
laurylcarnitine (C12)	2.3679	1.2436
ornithine	2.3678	1.2436
2-linoleoylglycerol (18:2)	0.42291	-1.2416
3-hydroxyisobutyrate	2.3448	1.2295
1-palmitoleoylglycerol (16:1)*	2.3009	1.2022
alpha-hydroxyisocaproate	2.3009	1.2022
anserine	2.2935	1.1976
1-linoleoyl-2-linolenoyl-GPC (18:2/18:3)*	2.2875	1.1938
eicosenoylcarnitine (C20:1)*	0.43795	-1.1912
histidylalanine	0.43868	-1.1887
N-stearoyl-sphinganine (d18:0/18:0)*	2.2738	1.1851
5-HETE	2.2664	1.1804
N6-carboxymethyllysine	0.44334	-1.1735
glutarate (pentanedioate)	2.2428	1.1653
sphingomyelin (d18:0/20:0, d16:0/22:0)*	2.2407	1.1639
S-methylmethionine	2.2325	1.1586
isovalerylcarnitine (C5)	2.2323	1.1585
glycosyl-N-stearoyl-sphinganine (d18:0/18:0)*	2.2317	1.1582
nicotinamide riboside	0.45144	-1.1474
thymidine 5'-monophosphate	2.2092	1.1435
caffeic acid sulfate	0.45284	-1.1429
pipecolate	2.2008	1.138
N-palmitoyl-sphinganine (d18:0/16:0)	2.1883	1.1298
2'-deoxyuridine	2.1809	1.1249
N-palmitoyltaurine	2.1805	1.1246
1-(1-enyl-palmitoyl)-2-arachidonoyl-GPE (P-16:0/20:4)*	2.151	1.105
N-formylphenylalanine	2.1494	1.1039
argininosuccinate	2.1446	1.1007
linoleoyl-linoleoyl-glycerol (18:2/18:2) [1]*	0.4664	-1.1004
palmitoleoylcarnitine (C16:1)*	2.1329	1.0928
1-palmitoyl-2-stearoyl-GPC (16:0/18:0)	2.1278	1.0893
14-HDoHE/17-HDoHE	2.1263	1.0883
N-acetylaspartate (NAA)	2.1179	1.0826
N-arachidonoyltaurine	0.4729	-1.0804
sucrose	2.1017	1.0716
linoleate (18:2n6)	0.48068	-1.0568
5-KETE	2.0685	1.0486
adrenate (22:4n6)	0.48675	-1.0387
adenine	0.4874	-1.0368
1-linoleoyl-2-arachidonoyl-GPE (18:2/20:4)*	0.48839	-1.0339
4-hydroxybutyrate (GHB)	0.48894	-1.0323
2-palmitoylglycerol (16:0)	2.0452	1.0322
sphingomyelin (d18:1/22:1, d18:2/22:0, d16:1/24:1)*	2.0418	1.0299
glutathione, reduced (GSH)	0.49215	-1.0228
methyl glucopyranoside (alpha + beta)	0.49228	-1.0225
1-palmitoyl-2-stearoyl-GPE (16:0/18:0)*	2.0245	1.0176
nicotinamide adenine dinucleotide reduced (NADH)	0.49403	-1.0173
7-methylguanine	2.0227	1.0163
myristate (14:0)	2.0219	1.0157
margarate (17:0)	2.0152	1.0109
pimelate (heptanedioate)	2.0151	1.0109
glycosyl-N-palmitoyl-sphingosine (d18:1/16:0)	2.0037	1.0027
palmitoyl dihydrosphingomyelin (d18:0/16:0)*	2.0024	1.0017
