# Supplementary material for: Metabolic Profiling and Integration of Metabolomic and Transcriptomic Data From Pectoralis Muscle Reveal Winter-Adaptive Metabolic Responses of Black-Capped Chickadee and American Goldfinch
Source: Frontiers journal article supplement (doi:10.3389/fevo.2022.866130), 2022-04-12
Supplement: Table_5.xlsx [file Table_5.xlsx]

## Sheet: BCCHcorWinter
Table 5. Results of the IMPaLA ORA analysis of the Winter correlated cluster in black-capped chickadee.
Pathway Name	pathway_source	num_overlapping_genes	overlapping_genes	num_all_pathway_genes	P_genes	Q_genes	num_overlapping_metabolites	overlapping_metabolites	num_all_pathway_metabolites	P_metabolites	Q_metabolites	P_joint	Q_joint
Transport of small molecules	Reactome	0		641 (641)	1	1	22	6262;79025;790;18950;985;750;597;10747814;1176;10467;1110;938;6030;145742;439155;439153;190;51;247;5960;5281;6274	196 (219)	2.87e-14	1.07e-10	9.25e-13	1.26e-09
SLC-mediated transmembrane transport	Reactome	0		243 (243)	1	1	20	6262;79025;6030;145742;790;18950;938;985;247;750;5281;51;597;1176;10467;439155;1110;5960;190;6274	158 (164)	5.33e-14	1.07e-10	1.68e-12	1.26e-09
Arginine and Proline Metabolism	SMPDB	0		20 (20)	1	1	11	6262;145742;6083;439155;439153;750;51;1176;1110;5960;9750	52 (52)	1.56e-10	4.19e-08	3.69e-09	3.95e-07
Amino Acid metabolism	Wikipathways	0		91 (91)	1	1	13	6262;145742;6137;3614;6288;750;51;1176;1110;5960;9750;124886;6274	95 (108)	9.11e-10	2.29e-07	1.99e-08	1.99e-06
Arginine Proline metabolism	INOH	0		55 (55)	1	1	11	6262;145742;6083;439155;439153;750;51;1176;9750;5960;1110	62 (68)	1.17e-09	2.76e-07	2.52e-08	2.36e-06
Selenium Micronutrient Network	Wikipathways	0		86 (86)	1	1	13	938;6137;493570;158980;936;5280581;1053;14985;444899;161166;790;124886;446284	98 (107)	1.35e-09	3.03e-07	2.9e-08	2.56e-06
Biosynthesis of unsaturated fatty acids - Homo sapiens (human)	KEGG	0		27 (27)	1	1	11	5281120;985;6439848;5282768;8215;5280581;10467;444899;5281;5281116;446284	69 (74)	3.86e-09	8.17e-07	7.86e-08	6.56e-06
Glycine Serine metabolism	INOH	0		40 (40)	1	1	10	6262;6137;6288;6083;439155;439153;750;51;247;1088	54 (68)	4.57e-09	9.2e-07	9.24e-08	7.31e-06
Leukotriene biosynthesis	HumanCyc	0		6 (6)	1	1	8	145742;6137;6288;750;5960;444899;124886;6274	30 (30)	8.17e-09	1.49e-06	1.6e-07	1.15e-05
Metabolism of amino acids and derivatives	Reactome	0		339 (339)	1	1	19	6262;1176;145742;3614;6083;439155;439153;161166;190;51;936;9750;5960;247;1110;124886;750;1088;6274	269 (286)	7.8e-09	1.49e-06	1.53e-07	1.15e-05
Glycine_ serine_ alanine and threonine metabolism	EHMN	0		78 (78)	1	1	11	6262;6137;6288;6083;439155;439153;750;51;247;124886;1088	75 (88)	9.65e-09	1.69e-06	1.88e-07	1.28e-05
Urea cycle and metabolism of arginine_ proline_ glutamate_ aspartate and asparagine	EHMN	0		105 (105)	1	1	12	6262;145742;6083;439153;750;51;1176;9750;5960;500;1110;124886	102 (125)	2.52e-08	4.23e-06	4.67e-07	3.05e-05
tRNA charging	HumanCyc	0		38 (38)	1	1	7	145742;6137;6288;6083;750;5960;6274	24 (24)	3.76e-08	6.05e-06	6.81e-07	4.26e-05
Urea Cycle	SMPDB	0		13 (13)	1	1	7	6262;6083;439153;51;1176;5960;9750	27 (27)	9.31e-08	1.17e-05	1.6e-06	7.75e-05
Transmission across Chemical Synapses	Reactome	1	NCALD	249 (249)	0.0893	1	9	439155;439153;247;750;5281;51;444899;985;1110	74 (78)	1.24e-06	5.33e-05	1.88e-06	8.83e-05
Gamma;-glutamyl cycle	HumanCyc	0		11 (11)	1	1	7	145742;6137;6288;750;5960;124886;6274	29 (29)	1.6e-07	1.87e-05	2.66e-06	0.000121
Histidine metabolism	EHMN	0		35 (35)	1	1	8	3614;6083;439155;439153;750;51;124886;6274	43 (45)	1.73e-07	1.87e-05	2.87e-06	0.000123
Neuronal System	Reactome	1	NCALD	391 (391)	0.137	1	9	439155;439153;247;750;5281;51;444899;985;1110	74 (78)	1.24e-06	5.33e-05	2.82e-06	0.000123
Glutamate Glutamine metabolism	INOH	0		27 (27)	1	1	7	6083;439153;750;51;5960;1110;124886	30 (34)	2.06e-07	1.87e-05	3.38e-06	0.000141
Metabolism of vitamins and cofactors	Reactome	0		180 (180)	1	1	14	938;493570;6083;985;439153;936;750;5281;51;439924;1053;439155;124886;14985	176 (188)	2.38e-07	1.87e-05	3.87e-06	0.000157
Retinol biosynthesis	HumanCyc	0		19 (19)	1	1	7	8215;985;5281;10747814;10467;444899;446284	31 (37)	2.63e-07	1.87e-05	4.24e-06	0.000168
Urea cycle and metabolism of amino groups	Wikipathways	0		0 (0)	1	1	6	6262;145742;1176;5960;9750;1088	31 (32)	5.26e-06	0.000173	5.26e-06	0.000173
Fatty acid activation	HumanCyc	0		8 (8)	1	1	7	6083;985;5281;8215;10467;444899;446284	32 (38)	3.32e-07	1.91e-05	5.29e-06	0.000189
Carnitine Synthesis	SMPDB	0		5 (5)	1	1	6	439155;439153;750;51;1110;10917	20 (20)	3.16e-07	1.87e-05	5.04e-06	0.000189
Trans-sulfuration and one-carbon metabolism	Wikipathways	0		31 (31)	1	1	7	6262;6137;439155;750;247;124886;1088	32 (33)	3.32e-07	1.91e-05	5.29e-06	0.000189
Glutamate Metabolism	SMPDB	0		23 (23)	1	1	8	69507;6083;439153;750;51;5960;1110;124886	48 (49)	4.24e-07	2.25e-05	6.65e-06	0.000208
The visual cycle I (vertebrates)	HumanCyc	0		16 (16)	1	1	8	985;439153;5281;8215;10467;444899;10747814;446284	50 (58)	5.89e-07	3.04e-05	9.04e-06	0.000277
S-methyl-5-thio-& alpha-D-ribose 1-phosphate degradation	HumanCyc	0		4 (4)	1	1	7	145742;6137;6288;750;51;5960;6274	35 (35)	6.4e-07	3.22e-05	9.77e-06	0.000288
Nicotinate and Nicotinamide Metabolism	SMPDB	0		14 (14)	1	1	7	938;6083;439155;439153;936;439924;439236	35 (35)	6.4e-07	3.22e-05	9.77e-06	0.000288
Metabolism	Reactome	0		1952 (1954)	1	1	38	6262;79025;790;18950;985;936;750;5281;439924;1053;439236;69507;3614;1176;301590;5960;444899;1110;1088;446284;938;6030;145742;493570;6083;439155;439153;190;51;247;10747814;444791;14985;161166;9750;124886;123874;6274	1225 (1411)	6.58e-07	3.27e-05	1e-05	0.000289
Cellular responses to stress	Reactome	1	BAG2	553 (554)	0.19	1	8	985;936;51;444899;439155;1110;124886;446284	63 (74)	3.64e-06	0.000131	1.05e-05	0.000297
Transport of inorganic cations/anions and amino acids/oligopeptides	Reactome	0		102 (102)	1	1	8	938;6262;145742;439155;750;5960;247;6274	52 (55)	8.06e-07	3.91e-05	1.21e-05	0.000331
NAD+ biosynthetic pathways	Wikipathways	0		22 (22)	1	1	5	938;439924;439153;936;161166	13 (13)	8.01e-07	3.91e-05	1.2e-05	0.000331
Cellular responses to external stimuli	Reactome	1	BAG2	568 (569)	0.194	1	8	985;936;51;444899;439155;1110;124886;446284	65 (76)	4.63e-06	0.000159	1.34e-05	0.00036
Aminoacyl-tRNA biosynthesis - Homo sapiens (human)	KEGG	0		66 (66)	1	1	6	145742;6137;6288;750;5960;6274	24 (52)	1.04e-06	5e-05	1.54e-05	0.000407
L-carnitine biosynthesis	HumanCyc	0		3 (3)	1	1	5	1110;439153;750;10917;51	14 (14)	1.23e-06	5.33e-05	1.8e-05	0.000418
Glycine and Serine Metabolism	SMPDB	0		27 (27)	1	1	8	6137;6083;439155;439153;750;51;247;1088	55 (55)	1.26e-06	5.33e-05	1.84e-05	0.000418
ABC transporters - Homo sapiens (human)	KEGG	0		45 (45)	1	1	11	6262;18950;145742;493570;6288;750;1176;5960;247;124886;6274	122 (138)	1.58e-06	6.55e-05	2.27e-05	0.000497
Signal Transduction	Reactome	0		2431 (2432)	1	1	16	6262;938;6083;985;439153;936;750;5281;51;5280581;9750;444899;439155;1110;10747814;446284	269 (290)	1.58e-06	6.55e-05	2.26e-05	0.000497
Metabolism of proteins	Reactome	2	LMAN2L;THY1	1934 (1935)	0.154	1	12	18950;6030;145742;79025;6083;439155;439153;750;10747814;69507;5960;6274	177 (288)	1.03e-05	0.00032	2.28e-05	0.000497
One-carbon metabolism and related pathways	Wikipathways	0		52 (52)	1	1	7	6137;439155;750;10747814;247;124886;1088	40 (42)	1.67e-06	6.87e-05	2.39e-05	0.000513
Leukotriene metabolism	EHMN	0		102 (102)	1	1	6	6083;439153;750;444899;611;124886	26 (27)	1.74e-06	7.02e-05	2.49e-05	0.000519
Methionine Metabolism	SMPDB	0		20 (20)	1	1	7	6137;6083;439155;439153;750;247;1088	42 (42)	2.36e-06	8.72e-05	3.3e-05	0.000611
Superpathway of choline degradation to L-serine	HumanCyc	0		7 (7)	1	1	5	6137;439153;1088;750;247	16 (16)	2.63e-06	9.6e-05	3.64e-05	0.000666
Ammonia Recycling	SMPDB	0		12 (12)	1	1	6	6083;439153;750;51;5960;6274	29 (29)	3.47e-06	0.000126	4.71e-05	0.000853
Urea cycle	HumanCyc	0		6 (6)	1	1	5	1176;9750;6262;5960;6083	17 (17)	3.68e-06	0.000131	4.97e-05	0.000888
Neurotransmitter release cycle	Reactome	0		50 (50)	1	1	7	985;439153;5281;51;444899;247;1110	45 (45)	3.83e-06	0.000135	5.16e-05	0.000912
Superpathway of purine nucleotide salvage	HumanCyc	0		59 (59)	1	1	6	790;6083;439153;190;5960;439236	30 (30)	4.29e-06	0.00015	5.73e-05	0.001
Sphingomyelin metabolism/ceramide salvage	HumanCyc	0		8 (8)	1	1	7	8215;985;5281;10747814;10467;444899;446284	46 (55)	4.47e-06	0.000155	5.95e-05	0.00103
Metabolism of carbohydrates	Reactome	0		284 (285)	1	1	10	79025;6030;18950;6083;439153;444791;51;69507;5960;439236	111 (157)	4.98e-06	0.00017	6.58e-05	0.00112
Methionine and cysteine metabolism	EHMN	0		78 (78)	1	1	8	6137;6083;439155;439153;750;51;5960;611	66 (80)	5.2e-06	0.000173	6.85e-05	0.00113
Phospholipases	HumanCyc	0		41 (41)	1	1	7	8215;985;5281;10747814;10467;444899;446284	47 (55)	5.19e-06	0.000173	6.83e-05	0.00113
Methionine De Novo and Salvage Pathway	Wikipathways	0		21 (21)	1	1	7	6262;6137;158980;439155;190;51;247	47 (48)	5.19e-06	0.000173	6.83e-05	0.00113
DNA Repair	Reactome	0		322 (323)	1	1	7	790;6083;439155;936;190;51;1110	48 (54)	6e-06	0.000196	7.81e-05	0.00128
Translation	Reactome	0		307 (307)	1	1	6	145742;6083;439155;750;5960;6274	32 (80)	6.39e-06	0.000207	8.29e-05	0.00134
Arginine biosynthesis - Homo sapiens (human)	KEGG	0		22 (22)	1	1	5	1176;6262;5960;9750;51	19 (23)	6.75e-06	0.000217	8.71e-05	0.00139
GPCR downstream signalling	Reactome	0		633 (633)	1	1	11	6262;938;6083;985;5281;51;10747814;444899;1110;5280581;446284	143 (152)	7.56e-06	0.000241	9.67e-05	0.00153
Vitamin B3 (nicotinate and nicotinamide) metabolism	EHMN	0		47 (47)	1	1	6	938;6083;439155;439153;936;439924	34 (36)	9.26e-06	0.000294	0.000117	0.00182
Malate-Aspartate Shuttle	SMPDB	0		4 (4)	1	1	4	439153;5960;51;525	10 (10)	9.4e-06	0.000295	0.000118	0.00183
Metabolism of water-soluble vitamins and cofactors	Reactome	0		111 (111)	1	1	10	938;493570;6083;439155;439153;936;750;439924;1053;124886	120 (125)	1.01e-05	0.000314	0.000126	0.00193
Glucose Homeostasis	Wikipathways	0		1 (1)	1	1	5	6262;9750;790;6137;6274	21 (21)	1.15e-05	0.000354	0.000143	0.00216
Selenoamino acid metabolism	Reactome	0		128 (128)	1	1	7	3614;6083;124886;936;750;439155;1088	53 (63)	1.18e-05	0.000361	0.000146	0.00219
Cell Cycle_ Mitotic	Reactome	0		523 (524)	1	1	6	6030;6083;439155;936;51;1110	36 (40)	1.31e-05	0.000396	0.00016	0.00239
Glycine betaine degradation	HumanCyc	0		5 (5)	1	1	4	6137;750;1088;247	11 (11)	1.46e-05	0.000438	0.000177	0.00261
Gene expression (Transcription)	Reactome	0		1438 (1439)	1	1	7	6083;439155;936;51;69507;1110;124886	55 (74)	1.52e-05	0.000453	0.000184	0.00268
Cell Cycle	Reactome	0		621 (622)	1	1	6	6030;6083;439155;936;51;1110	37 (44)	1.55e-05	0.000457	0.000187	0.0027
Nicotinate and Nicotinamide Metabolism	SMPDB	0		14 (14)	1	1	7	938;6083;439155;439153;936;439924;439236	35 (35)	6.4e-07	3.22e-05	9.77e-06	0.000288
Urea cycle	Reactome	0		10 (10)	1	1	5	6262;6083;5960;9750;1176	23 (23)	1.86e-05	0.000547	0.000221	0.00317
Metabolism overview	Wikipathways	0		0 (0)	1	1	7	6262;51;1176;1110;69507;9750;5960	80 (114)	0.000176	0.00348	0.000176	0.00348
Glucose metabolism	Reactome	0		92 (93)	1	1	6	79025;6083;439153;51;69507;5960	39 (39)	2.12e-05	0.000617	0.000249	0.00353
Glutamate and glutamine metabolism	Reactome	0		15 (15)	1	1	5	6262;5960;439153;145742;51	24 (24)	2.33e-05	0.000673	0.000271	0.00381
Methionine Cysteine metabolism	INOH	0		24 (24)	1	1	6	6137;6083;439155;439153;51;247	41 (45)	2.85e-05	0.000803	0.000327	0.00441
Mitochondrial tRNA aminoacylation	Reactome	0		21 (21)	1	1	5	6083;5960;145742;750;6274	25 (65)	2.87e-05	0.000803	0.000329	0.00441
Cytosolic tRNA aminoacylation	Reactome	0		24 (24)	1	1	5	6083;5960;145742;750;6274	25 (65)	2.87e-05	0.000803	0.000329	0.00441
tRNA Aminoacylation	Reactome	0		42 (42)	1	1	5	6083;5960;145742;750;6274	25 (65)	2.87e-05	0.000803	0.000329	0.00441
One-carbon metabolism	Wikipathways	0		28 (28)	1	1	5	750;247;6137;493570;439155	25 (25)	2.87e-05	0.000803	0.000329	0.00441
Cysteine and methionine metabolism - Homo sapiens (human)	KEGG	0		50 (50)	1	1	7	6137;158980;439155;5960;535;439750;124886	61 (63)	3.04e-05	0.000838	0.000347	0.00457
Adenosine nucleotides degradation	HumanCyc	0		9 (9)	1	1	4	6083;439153;790;439236	13 (13)	3.09e-05	0.000846	0.000352	0.0046
Histidine degradation	INOH	0		23 (23)	1	1	5	6083;439155;439153;3614;6274	26 (28)	3.51e-05	0.000924	0.000396	0.00491
Transport of vitamins_ nucleosides_ and related molecules	Reactome	0		44 (44)	1	1	7	6030;790;985;190;5281;597;10467	62 (63)	3.39e-05	0.000915	0.000382	0.00491
Nicotinate Nicotinamide metabolism	INOH	0		23 (23)	1	1	5	938;439924;936;6083;439155	26 (26)	3.51e-05	0.000924	0.000396	0.00491
Mitochondrial Beta-Oxidation of Long Chain Saturated Fatty Acids	SMPDB	0		10 (10)	1	1	5	6083;6426855;10917;5281;439153	26 (26)	3.51e-05	0.000924	0.000396	0.00491
Lysine metabolism	EHMN	0		60 (60)	1	1	6	6083;439155;439153;750;51;1110	43 (53)	3.77e-05	0.000986	0.000422	0.00519
Post-translational protein modification	Reactome	2	LMAN2L;THY1	1425 (1425)	0.0905	1	8	18950;6030;79025;6083;439155;439153;750;69507	121 (182)	0.00042	0.00738	0.000425	0.00519
NAD+ metabolism	Wikipathways	0		16 (16)	1	1	4	938;439924;439153;936	14 (14)	4.28e-05	0.00111	0.000473	0.00573
Triacylglycerol degradation	HumanCyc	0		15 (15)	1	1	6	985;5281;8215;10467;444899;446284	46 (54)	5.59e-05	0.00143	0.000604	0.00719
Protein digestion and absorption - Homo sapiens (human)	KEGG	0		103 (103)	1	1	6	145742;6137;6288;750;5960;6274	46 (47)	5.59e-05	0.00143	0.000604	0.00719
Choline catabolism	Reactome	0		6 (6)	1	1	4	750;439153;1088;247	15 (15)	5.77e-05	0.00147	0.000621	0.00734
Signaling by GPCR	Reactome	0		706 (706)	1	1	11	6262;938;6083;985;5281;51;10747814;444899;1110;5280581;446284	179 (190)	6.29e-05	0.00158	0.000672	0.00782
Regulation of lipid metabolism by PPAR alpha	Reactome	0		20 (20)	1	1	3	985;446284;444899	6 (7)	6.41e-05	0.0016	0.000683	0.00789
Nicotinate metabolism	Reactome	0		24 (24)	1	1	6	938;6083;439155;439153;936;439924	49 (50)	8.06e-05	0.002	0.00084	0.00963
Gluconeogenesis	Reactome	0		34 (35)	1	1	5	5960;79025;439153;69507;51	31 (31)	8.56e-05	0.0021	0.000887	0.00994
Metabolism of ingested SeMet_ Sec_ MeSec into H2Se	Reactome	0		9 (9)	1	1	5	1088;936;750;3614;439155	31 (33)	8.56e-05	0.0021	0.000887	0.00994
GABA synthesis_ release_ reuptake and degradation	Reactome	0		19 (19)	1	1	4	1110;439153;51;247	17 (17)	9.83e-05	0.00216	0.00101	0.00994
Carnitine synthesis	Reactome	0		4 (4)	1	1	4	1110;439153;750;51	17 (17)	9.83e-05	0.00216	0.00101	0.00994
Epigenetic regulation of gene expression	Reactome	0		139 (140)	1	1	4	1110;439155;936;51	17 (22)	9.83e-05	0.00216	0.00101	0.00994
Cell recruitment (pro-inflammatory response)	Reactome	0		20 (20)	1	1	4	6083;439924;6030;936	17 (20)	9.83e-05	0.00216	0.00101	0.00994
Purine Metabolism	SMPDB	0		37 (37)	1	1	7	790;6083;190;439153;750;5960;439236	73 (73)	9.83e-05	0.00216	0.00101	0.00994
Amino acid transport across the plasma membrane	Reactome	0		32 (32)	1	1	5	6262;145742;247;750;6274	32 (32)	0.0001	0.00219	0.00102	0.01
Sphingosine and sphingosine-1-phosphate metabolism	HumanCyc	0		9 (9)	1	1	6	985;5281;8215;10467;444899;446284	51 (59)	0.000101	0.0022	0.00103	0.0101
Adenine and adenosine salvage I	HumanCyc	0		1 (1)	1	1	3	6083;190;439236	7 (7)	0.000111	0.0024	0.00112	0.0109
Alpha Linolenic Acid and Linoleic Acid Metabolism	SMPDB	0		6 (6)	1	1	4	10747814;444899;446284;5280581	18 (18)	0.000125	0.00267	0.00125	0.0119
Nucleotide metabolism	Wikipathways	0		19 (19)	1	1	4	6262;190;790;41211	18 (18)	0.000125	0.00267	0.00125	0.0119
Gluconeogenesis	SMPDB	0		22 (22)	1	1	5	79025;439153;69507;51;525	34 (34)	0.000135	0.00278	0.00134	0.0122
Triosephosphate isomerase	SMPDB	0		22 (22)	1	1	5	79025;439153;69507;51;525	34 (34)	0.000135	0.00278	0.00134	0.0122
Transport of bile salts and organic acids_ metal ions and amine compounds	Reactome	0		84 (84)	1	1	7	145742;750;51;1176;247;1110;6274	77 (79)	0.000138	0.00283	0.00137	0.0124
Purine nucleotides nucleosides metabolism	INOH	0		107 (107)	1	1	7	790;6083;190;439153;750;1176;5960	78 (80)	0.00015	0.00305	0.00147	0.0132
Purine nucleotides degradation	HumanCyc	0		12 (12)	1	1	4	6083;439153;790;439236	19 (19)	0.000156	0.00316	0.00153	0.0137
Creatine biosynthesis	HumanCyc	0		2 (2)	1	1	3	6262;439155;750	8 (8)	0.000175	0.00348	0.00169	0.0148
Malate-aspartate shuttle	HumanCyc	0		5 (5)	1	1	3	439153;5960;51	8 (8)	0.000175	0.00348	0.00169	0.0148
Oxidative Stress Induced Senescence	Reactome	0		124 (125)	1	1	3	1110;439155;51	8 (9)	0.000175	0.00348	0.00169	0.0148
Glycine Metabolism	Wikipathways	0		3 (3)	1	1	3	124886;124886;750	8 (10)	0.000175	0.00348	0.00169	0.0148
Nicotinamide salvaging	Reactome	0		12 (12)	1	1	5	938;439155;439153;936;6083	36 (37)	0.000179	0.0035	0.00172	0.0149
Superpathway of methionine degradation	HumanCyc	0		19 (19)	1	1	5	439155;439153;6137;51;247	36 (36)	0.000179	0.0035	0.00172	0.0149
Fatty acid &alpha;-oxidation	HumanCyc	0		5 (5)	1	1	4	6083;1110;439153;51	20 (20)	0.000193	0.00376	0.00185	0.0158
Betaine Metabolism	SMPDB	0		8 (8)	1	1	4	439155;439153;6137;247	21 (22)	0.000236	0.00455	0.00221	0.0187
Methylhistidine Metabolism	SMPDB	0		0 (0)	1	1	2	439155;6274	4 (4)	0.00133	0.0188	0.00133	0.0188
G alpha (q) signalling events	Reactome	0		221 (221)	1	1	6	6262;985;5281;5280581;444899;446284	60 (64)	0.000253	0.00485	0.00235	0.0198
4-aminobutyrate degradation	HumanCyc	0		2 (2)	1	1	3	1110;439153;51	9 (9)	0.00026	0.00494	0.00241	0.0201
Alanine Aspartate Asparagine metabolism	INOH	0		25 (25)	1	1	5	6083;9750;5960;750;51	39 (45)	0.000264	0.00497	0.00244	0.0201
Transport of fatty acids	Reactome	0		8 (8)	1	1	3	985;10467;5281	9 (10)	0.00026	0.00494	0.00241	0.0201
Glyoxylate metabolism and glycine degradation	Reactome	0		32 (32)	1	1	5	5960;439155;439153;1088;750	39 (42)	0.000264	0.00497	0.00244	0.0201
Phytanic acid peroxisomal oxidation	EHMN	0		16 (16)	1	1	4	1110;6083;439153;51	22 (22)	0.000285	0.00534	0.00261	0.0215
Metabolism of nucleotides	Reactome	0		102 (102)	1	1	9	6030;790;6083;190;439153;750;5960;124886;439236	145 (154)	0.000289	0.00538	0.00264	0.0216
Purine metabolism	EHMN	0		222 (222)	1	1	7	790;6083;190;439153;750;1176;5960	87 (94)	0.000298	0.00546	0.00272	0.0217
Metabolism of RNA	Reactome	0		583 (584)	1	1	5	6083;439155;439153;6030;51	40 (77)	0.000298	0.00546	0.00272	0.0217
Histidine Metabolism	SMPDB	0		15 (15)	1	1	5	6083;439155;439153;3614;6274	40 (40)	0.000298	0.00546	0.00272	0.0217
Fatty acid & alpha-oxidation III	HumanCyc	0		3 (3)	1	1	4	6083;985;439153;5281	23 (23)	0.000341	0.00619	0.00307	0.0242
Cellular Senescence	Reactome	0		186 (187)	1	1	3	1110;439155;51	10 (13)	0.000368	0.00661	0.00328	0.0256
Degradation of GABA	Reactome	0		2 (2)	1	1	3	1110;439153;51	10 (10)	0.000368	0.00661	0.00328	0.0256
Glycerophospholipid metabolism	EHMN	0		136 (136)	1	1	6	6288;439155;439153;750;10747814;123874	65 (95)	0.000393	0.007	0.00348	0.0269
M Phase	Reactome	0		382 (383)	1	1	4	1110;439155;936;51	24 (26)	0.000405	0.00715	0.00357	0.0274
Free fatty acid receptors	Reactome	0		5 (5)	1	1	4	985;5281;446284;5280581	24 (24)	0.000405	0.00715	0.00357	0.0274
Purine metabolism - Homo sapiens (human)	KEGG	0		129 (130)	1	1	7	790;6083;750;190;1176;41211;439236	93 (95)	0.00045	0.00787	0.00392	0.0299
Generic Transcription Pathway	Reactome	0		1177 (1178)	1	1	5	6083;439155;69507;124886;936	44 (55)	0.00047	0.00818	0.00407	0.0309
cAMP signaling pathway - Homo sapiens (human)	KEGG	0		216 (216)	1	1	4	6083;1110;5283454;26613	25 (25)	0.000477	0.00823	0.00412	0.031
Methionine degradation	HumanCyc	0		6 (6)	1	1	3	439155;6137;247	11 (11)	0.0005	0.00846	0.0043	0.0315
Asparagine biosynthesis	HumanCyc	0		3 (3)	1	1	3	6083;5960;51	11 (11)	0.0005	0.00846	0.0043	0.0315
Ca-dependent events	Reactome	0		39 (39)	1	1	3	6083;444899;10747814	11 (11)	0.0005	0.00846	0.0043	0.0315
Condensation of Prophase Chromosomes	Reactome	0		78 (79)	1	1	3	1110;439155;51	11 (11)	0.0005	0.00846	0.0043	0.0315
Nucleotide salvage	Reactome	0		23 (23)	1	1	5	6083;190;6030;790;439236	45 (45)	0.000522	0.0088	0.00447	0.0326
De novo fatty acid biosynthesis	EHMN	0		43 (43)	1	1	4	6083;985;5281;8215	26 (59)	0.000557	0.0093	0.00473	0.0342
Alpha-oxidation of phytanate	Reactome	0		6 (6)	1	1	4	1110;6083;439153;51	26 (27)	0.000557	0.0093	0.00473	0.0342
Glycine_ serine and threonine metabolism - Homo sapiens (human)	KEGG	0		40 (40)	1	1	5	5960;1088;6288;750;247	47 (50)	0.000641	0.0106	0.00535	0.0381
RNA Polymerase II Transcription	Reactome	0		1306 (1307)	1	1	5	6083;439155;69507;124886;936	47 (62)	0.000641	0.0106	0.00535	0.0381
Glycolysis	Reactome	0		72 (73)	1	1	4	6083;79025;439153;69507	27 (27)	0.000647	0.0106	0.00539	0.0382
Adenine and adenosine salvage III	HumanCyc	0		3 (3)	1	1	3	190;790;439236	12 (12)	0.00066	0.0108	0.00549	0.0387
Tryptophan metabolism	EHMN	0		22 (22)	1	1	6	6083;439155;439153;51;161166;124886	72 (78)	0.000685	0.0112	0.00567	0.0398
Nucleobase biosynthesis	Reactome	0		15 (15)	1	1	5	6083;6030;5960;750;439153	48 (48)	0.000707	0.0115	0.00584	0.0408
Linoleic acid metabolism - Homo sapiens (human)	KEGG	0		29 (29)	1	1	4	5280581;6246154;444899;10747814	28 (28)	0.000746	0.012	0.00612	0.0423
tRNA modification in the nucleus and cytosol	Reactome	0		41 (41)	1	1	4	6083;439155;439153;51	28 (48)	0.000746	0.012	0.00612	0.0423
Arachidonic acid metabolism	EHMN	0		98 (98)	1	1	5	6083;439153;124886;444899;10747814	50 (53)	0.000855	0.0134	0.00689	0.0465
L-dopa degradation	HumanCyc	0		1 (1)	1	1	3	439155;439153;51	13 (13)	0.000849	0.0134	0.00685	0.0465
Histamine degradation	HumanCyc	0		2 (2)	1	1	3	439155;439153;3614	13 (13)	0.000849	0.0134	0.00685	0.0465
GABA shunt	HumanCyc	0		8 (8)	1	1	3	1110;439153;51	13 (13)	0.000849	0.0134	0.00685	0.0465
Fatty acid biosynthesis - Homo sapiens (human)	KEGG	0		18 (18)	1	1	3	985;5281;867	13 (58)	0.000849	0.0134	0.00685	0.0465
Mineral absorption - Homo sapiens (human)	KEGG	0		59 (59)	1	1	4	750;145742;6137;6288	29 (29)	0.000855	0.0134	0.0069	0.0465
Vitamin B12 metabolism	Wikipathways	0		51 (51)	1	1	5	439155;439153;6137;14985;493570	52 (61)	0.00102	0.016	0.00807	0.0541
Citrulline-nitric oxide cycle	HumanCyc	0		5 (5)	1	1	3	9750;6083;5960	14 (14)	0.00107	0.0166	0.00838	0.0553
Ferroptosis - Homo sapiens (human)	KEGG	0		41 (41)	1	1	4	5289133;124886;14985;444899	31 (31)	0.00111	0.0166	0.00864	0.0553
Integration of energy metabolism	Reactome	0		91 (91)	1	1	4	6083;985;69507;79025	31 (34)	0.00111	0.0166	0.00864	0.0553
Purine salvage	Reactome	0		13 (13)	1	1	4	6083;190;790;439236	31 (31)	0.00111	0.0166	0.00864	0.0553
tRNA processing	Reactome	0		103 (103)	1	1	4	6083;439155;439153;51	31 (52)	0.00111	0.0166	0.00864	0.0553
Na+/Cl- dependent neurotransmitter transporters	Reactome	0		19 (19)	1	1	4	145742;247;750;6274	31 (32)	0.00111	0.0166	0.00864	0.0553
Transcriptional Regulation by TP53	Reactome	0		361 (361)	1	1	4	6083;439155;69507;124886	31 (39)	0.00111	0.0166	0.00864	0.0553
Trans-sulfuration pathway	Wikipathways	0		10 (10)	1	1	3	439155;6137;124886	14 (14)	0.00107	0.0166	0.00838	0.0553
The citric acid (TCA) cycle and respiratory electron transport	Reactome	0		162 (162)	1	1	5	6083;1110;439153;124886;51	53 (59)	0.00112	0.0167	0.00871	0.0555
Class A/1 (Rhodopsin-like receptors)	Reactome	0		346 (346)	1	1	7	938;985;5281;51;5280581;1110;446284	109 (113)	0.00117	0.0174	0.00906	0.0574
Fatty acid & beta-oxidation	HumanCyc	0		19 (19)	1	1	6	6083;985;439153;5281;8215;10467	81 (84)	0.00128	0.0188	0.00979	0.0607
Serine and glycine biosynthesis	HumanCyc	0		7 (7)	1	1	3	439153;750;51	15 (15)	0.00132	0.0188	0.0101	0.0607
Ornithine de novo biosynthesis	HumanCyc	0		5 (5)	1	1	3	6262;439153;51	15 (15)	0.00132	0.0188	0.0101	0.0607
Nicotinate and nicotinamide metabolism - Homo sapiens (human)	KEGG	0		35 (35)	1	1	5	5960;439924;936;938;1110	55 (55)	0.00132	0.0188	0.0101	0.0607
Purine ribonucleosides degradation to ribose-1-phosphate	HumanCyc	0		3 (3)	1	1	3	190;790;439236	15 (15)	0.00132	0.0188	0.0101	0.0607
Aspartate biosynthesis	HumanCyc	0		2 (2)	1	1	2	5960;51	4 (4)	0.00133	0.0188	0.0101	0.0607
Sphingolipid de novo biosynthesis	Reactome	0		41 (41)	1	1	4	985;439153;5281;10747814	32 (35)	0.00125	0.0186	0.00961	0.0607
Creatine metabolism	Reactome	0		11 (11)	1	1	3	6262;439155;750	15 (15)	0.00132	0.0188	0.0101	0.0607
Proton-coupled neutral amino acid transporters	Reactome	0		2 (2)	1	1	2	145742;750	4 (4)	0.00133	0.0188	0.0101	0.0607
Removal of the Flap Intermediate	Reactome	0		14 (14)	1	1	2	6083;6030	4 (6)	0.00133	0.0188	0.0101	0.0607
Processive synthesis on the lagging strand	Reactome	0		15 (15)	1	1	2	6083;6030	4 (6)	0.00133	0.0188	0.0101	0.0607
N-glycan trimming and elongation in the cis-Golgi	Reactome	0		5 (5)	1	1	2	18950;79025	4 (13)	0.00133	0.0188	0.0101	0.0607
Removal of the Flap Intermediate from the C-strand	Reactome	0		16 (16)	1	1	2	6083;6030	4 (6)	0.00133	0.0188	0.0101	0.0607
Fatty acid & beta-oxidation (peroxisome)	HumanCyc	0		19 (19)	1	1	6	6083;985;439153;5281;8215;10467	82 (85)	0.00136	0.0192	0.0104	0.062
Phenylalanine and tyrosine metabolism	Reactome	0		13 (13)	1	1	4	439153;5960;124886;51	33 (33)	0.00141	0.0197	0.0107	0.0632
Tryptophan catabolism	Reactome	0		14 (14)	1	1	4	439153;161166;51;6274	33 (34)	0.00141	0.0197	0.0107	0.0632
Tryptophan degradation	INOH	0		66 (66)	1	1	5	6083;439155;439153;750;161166	56 (62)	0.00144	0.0201	0.0108	0.0641
Fructose and mannose metabolism	EHMN	0		21 (21)	1	1	4	18950;439153;69507;79025	34 (34)	0.00158	0.0209	0.0118	0.0653
Cysteine biosynthesis	HumanCyc	0		8 (8)	1	1	3	439155;6137;247	16 (16)	0.00161	0.0209	0.012	0.0653
Lysine degradation	INOH	0		22 (22)	1	1	4	1110;439153;750;51	34 (36)	0.00158	0.0209	0.0118	0.0653
Glycolysis Gluconeogenesis	INOH	0		45 (46)	1	1	4	439153;69507;750;51	34 (34)	0.00158	0.0209	0.0118	0.0653
Sphingolipid metabolism	Reactome	0		87 (87)	1	1	5	79025;439153;985;5281;10747814	57 (65)	0.00156	0.0209	0.0116	0.0653
Chromatin modifying enzymes	Reactome	0		271 (271)	1	1	3	1110;439155;51	16 (17)	0.00161	0.0209	0.012	0.0653
Chromatin organization	Reactome	0		271 (271)	1	1	3	1110;439155;51	16 (17)	0.00161	0.0209	0.012	0.0653
PLC beta mediated events	Reactome	0		50 (50)	1	1	3	6083;444899;10747814	16 (17)	0.00161	0.0209	0.012	0.0653
Ketone body metabolism	Reactome	0		10 (10)	1	1	3	6083;1110;439153	16 (16)	0.00161	0.0209	0.012	0.0653
G-protein mediated events	Reactome	0		55 (55)	1	1	3	6083;444899;10747814	16 (17)	0.00161	0.0209	0.012	0.0653
Glycogen metabolism	Reactome	0		24 (24)	1	1	3	6083;79025;6030	16 (16)	0.00161	0.0209	0.012	0.0653
Beta-Alanine Metabolism	SMPDB	0		9 (9)	1	1	4	439153;5960;51;6274	34 (34)	0.00158	0.0209	0.0118	0.0653
Aspartate Metabolism	SMPDB	0		14 (14)	1	1	4	6083;9750;5960;51	34 (34)	0.00158	0.0209	0.0118	0.0653
Ethanol effects on histone modifications	Wikipathways	0		31 (31)	1	1	3	439155;750;6137	16 (21)	0.00161	0.0209	0.012	0.0653
Amino Acid Metabolism Pathway Excerpt (Histidine catabolism extension)	Wikipathways	0		4 (4)	1	1	3	1110;51;6274	16 (16)	0.00161	0.0209	0.012	0.0653
Proteoglycan biosynthesis	Wikipathways	0		18 (18)	1	1	3	6083;6030;444791	16 (17)	0.00161	0.0209	0.012	0.0653
Vitamin digestion and absorption - Homo sapiens (human)	KEGG	0		24 (24)	1	1	4	1053;936;14985;493570	35 (39)	0.00176	0.0229	0.0129	0.0704
Transport to the Golgi and subsequent modification	Reactome	1	LMAN2L	167 (167)	0.0606	1	2	18950;79025	18 (37)	0.0295	0.186	0.0131	0.071
Stearate biosynthesis	HumanCyc	0		13 (13)	1	1	3	6083;985;5281	17 (17)	0.00193	0.0245	0.014	0.0738
4-hydroxybenzoate biosynthesis	HumanCyc	0		1 (1)	1	1	3	6083;439153;51	17 (17)	0.00193	0.0245	0.014	0.0738
Synthesis of 15-eicosatetraenoic acid derivatives	Reactome	0		6 (6)	1	1	3	439153;124886;444899	17 (18)	0.00193	0.0245	0.014	0.0738
Mitotic Prophase	Reactome	0		147 (148)	1	1	3	1110;439155;51	17 (19)	0.00193	0.0245	0.014	0.0738
Alanine Metabolism	SMPDB	0		5 (5)	1	1	3	6083;750;51	17 (17)	0.00193	0.0245	0.014	0.0738
Butanoate metabolism	EHMN	0		23 (23)	1	1	4	1110;6083;439153;51	36 (36)	0.00196	0.0246	0.0142	0.0739
Superpathway of conversion of glucose to acetyl CoA and entry into the TCA cycle	HumanCyc	0		47 (48)	1	1	4	1110;79025;439153;51	36 (36)	0.00196	0.0246	0.0142	0.0739
Tryptophan Metabolism	SMPDB	0		19 (19)	1	1	5	439155;439153;161166;51;41211	60 (60)	0.00196	0.0246	0.0142	0.0739
Nitric oxide signaling pathway	BioCarta	0		19 (19)	1	1	2	9750;611	5 (5)	0.00219	0.0267	0.0156	0.0788
Pentose phosphate pathway	EHMN	0		29 (29)	1	1	4	6083;439153;69507;439236	37 (37)	0.00217	0.0267	0.0155	0.0788
Purine nucleotides de novo biosynthesis	HumanCyc	0		59 (59)	1	1	4	6083;439153;5960;750	37 (37)	0.00217	0.0267	0.0155	0.0788
Purine ribonucleoside monophosphate biosynthesis	Reactome	0		12 (12)	1	1	4	6083;439153;5960;750	37 (37)	0.00217	0.0267	0.0155	0.0788
Negative epigenetic regulation of rRNA expression	Reactome	0		88 (89)	1	1	2	439155;936	5 (8)	0.00219	0.0267	0.0156	0.0788
HDMs demethylate histones	Reactome	0		50 (50)	1	1	2	1110;51	5 (5)	0.00219	0.0267	0.0156	0.0788
Calnexin/calreticulin cycle	Reactome	0		24 (24)	1	1	2	18950;79025	5 (17)	0.00219	0.0267	0.0156	0.0788
SIRT1 negatively regulates rRNA expression	Reactome	0		71 (72)	1	1	2	439155;936	5 (6)	0.00219	0.0267	0.0156	0.0788
Methylation Pathways	Wikipathways	0		9 (9)	1	1	2	439155;6137	5 (5)	0.00219	0.0267	0.0156	0.0788
Biosynthesis of E-series 18(S)-resolvins	Reactome	0		5 (5)	1	1	3	439153;124886;446284	18 (20)	0.00229	0.0278	0.0162	0.0816
Cellular response to chemical stress	Reactome	0		99 (99)	1	1	4	985;124886;444899;446284	38 (41)	0.0024	0.029	0.0169	0.0845
Sulfur amino acid metabolism	Reactome	0		27 (27)	1	1	5	439155;439153;190;51;247	63 (67)	0.00244	0.0293	0.0171	0.0853
GPCR ligand binding	Reactome	0		476 (476)	1	1	8	6262;938;985;5281;51;5280581;1110;446284	160 (168)	0.00261	0.0313	0.0181	0.0901
Acyl-CoA hydrolysis	HumanCyc	0		3 (3)	1	1	4	985;10467;5281;8215	39 (39)	0.00264	0.0317	0.0183	0.0909
Butyrate Metabolism	SMPDB	0		8 (8)	1	1	3	1110;6083;439153	19 (19)	0.00269	0.0321	0.0186	0.0918
Regulation of HSF1-mediated heat shock response	Reactome	1	BAG2	81 (81)	0.0298	1	1	936	7 (7)	0.101	0.397	0.0205	0.101
Asparagine N-linked glycosylation	Reactome	1	LMAN2L	283 (283)	0.101	1	4	79025;6030;69507;18950	79 (121)	0.0308	0.19	0.0211	0.103
Alanine and aspartate metabolism	Wikipathways	0		12 (12)	1	1	3	1110;5960;51	20 (20)	0.00314	0.0372	0.0212	0.103
Metabolism of fat-soluble vitamins	Reactome	0		49 (49)	1	1	4	985;439153;5281;14985	41 (49)	0.00318	0.0375	0.0215	0.104
Vesicle-mediated transport	Reactome	1	LMAN2L	617 (617)	0.21	1	3	6083;18950;10747814	35 (66)	0.0153	0.117	0.0216	0.104
mRNA decay by 5_ to 3_ exoribonuclease	Reactome	0		15 (15)	1	1	2	6083;6030	6 (7)	0.00325	0.0379	0.0219	0.104
DNA strand elongation	Reactome	0		32 (32)	1	1	2	6083;6030	6 (8)	0.00325	0.0379	0.0219	0.104
Intracellular metabolism of fatty acids regulates insulin secretion	Reactome	0		3 (3)	1	1	2	6083;985	6 (6)	0.00325	0.0379	0.0219	0.104
Lagging Strand Synthesis	Reactome	0		20 (20)	1	1	2	6083;6030	6 (8)	0.00325	0.0379	0.0219	0.104
Omega-6 fatty acid metabolism	EHMN	0		28 (28)	1	1	3	6083;439153;444899	21 (23)	0.00362	0.0416	0.024	0.112
Vitamin E metabolism	EHMN	0		43 (43)	1	1	3	6083;439153;14985	21 (21)	0.00362	0.0416	0.024	0.112
Folate transformations	HumanCyc	0		11 (11)	1	1	3	6137;439153;750	21 (21)	0.00362	0.0416	0.024	0.112
Butanoate metabolism	INOH	0		17 (17)	1	1	3	1110;6083;439153	21 (23)	0.00362	0.0416	0.024	0.112
Transport of nucleosides and free purine and pyrimidine bases across the plasma membrane	Reactome	0		12 (12)	1	1	3	790;190;597	21 (21)	0.00362	0.0416	0.024	0.112
G alpha (i) signalling events	Reactome	0		316 (316)	1	1	6	938;6083;51;10747814;444899;1110	100 (106)	0.00375	0.0421	0.0247	0.113
Pyruvate metabolism and Citric Acid (TCA) cycle	Reactome	0		53 (53)	1	1	4	1110;439153;124886;51	43 (44)	0.00379	0.0421	0.0249	0.113
Fatty acid Metabolism	SMPDB	0		14 (14)	1	1	4	6083;985;10917;439153	43 (43)	0.00379	0.0421	0.0249	0.113
Linoleate metabolism	EHMN	0		72 (72)	1	1	3	6246154;124886;10747814	22 (24)	0.00415	0.0451	0.0269	0.119
Tyrosine metabolism	INOH	0		33 (33)	1	1	4	1110;439155;439153;51	44 (44)	0.00412	0.0451	0.0268	0.119
Aldosterone synthesis and secretion - Homo sapiens (human)	KEGG	0		98 (98)	1	1	3	6083;439153;444899	22 (22)	0.00415	0.0451	0.0269	0.119
Histidine catabolism	Reactome	0		8 (8)	1	1	3	439155;3614;6274	22 (22)	0.00415	0.0451	0.0269	0.119
Base Excision Repair	Reactome	0		93 (94)	1	1	3	190;936;790	22 (26)	0.00415	0.0451	0.0269	0.119
2-oxoglutarate decarboxylation to succinyl-CoA	HumanCyc	0		3 (3)	1	1	2	439153;51	7 (7)	0.0045	0.0477	0.0288	0.123
Choline degradation	HumanCyc	0		2 (2)	1	1	2	439153;247	7 (7)	0.0045	0.0477	0.0288	0.123
Lysine degradation - Homo sapiens (human)	KEGG	0		63 (63)	1	1	4	1110;743;750;51	45 (50)	0.00447	0.0477	0.0287	0.123
Activation of Ca-permeable Kainate Receptor	Reactome	1	NCALD	12 (12)	0.00446	1	0		3 (3)	1	1	0.0286	0.123
Ionotropic activity of kainate receptors	Reactome	1	NCALD	12 (12)	0.00446	1	0		4 (4)	1	1	0.0286	0.123
Cellular response to hypoxia	Reactome	0		23 (23)	1	1	2	1110;51	7 (7)	0.0045	0.0477	0.0288	0.123
Cellular hexose transport	Reactome	0		20 (20)	1	1	2	18950;79025	7 (7)	0.0045	0.0477	0.0288	0.123
Synthesis of diphthamide-EEF2	Reactome	0		7 (7)	1	1	2	6083;439155	7 (7)	0.0045	0.0477	0.0288	0.123
Cleavage of the damaged purine	Reactome	0		59 (60)	1	1	2	190;790	7 (9)	0.0045	0.0477	0.0288	0.123
Phospho-PLA2 pathway	Reactome	0		2 (2)	1	1	2	444899;10747814	7 (7)	0.0045	0.0477	0.0288	0.123
Depurination	Reactome	0		59 (60)	1	1	2	190;790	7 (9)	0.0045	0.0477	0.0288	0.123
Oxygen-dependent proline hydroxylation of Hypoxia-inducible Factor Alpha	Reactome	0		21 (21)	1	1	2	1110;51	7 (7)	0.0045	0.0477	0.0288	0.123
Cellular response to heat stress	Reactome	1	BAG2	97 (97)	0.0356	1	1	936	9 (10)	0.128	0.447	0.0292	0.124
TCA cycle	HumanCyc	0		19 (19)	1	1	3	1110;439153;51	23 (23)	0.00472	0.0493	0.03	0.126
Synthesis of very long-chain fatty acyl-CoAs	Reactome	0		24 (24)	1	1	3	6083;985;444899	23 (27)	0.00472	0.0493	0.03	0.126
TP53 Regulates Metabolic Genes	Reactome	0		76 (76)	1	1	3	6083;69507;124886	23 (25)	0.00472	0.0493	0.03	0.126
Regulation of insulin secretion	Reactome	0		67 (67)	1	1	3	6083;985;79025	23 (26)	0.00472	0.0493	0.03	0.126
Prostaglandin formation from arachidonate	EHMN	0		33 (33)	1	1	4	6083;439153;124886;444899	46 (48)	0.00484	0.0505	0.0307	0.129
Galactose metabolism	EHMN	0		44 (44)	1	1	4	18950;6030;439153;79025	47 (47)	0.00524	0.0539	0.0327	0.135
Histidine metabolism - Homo sapiens (human)	KEGG	0		22 (22)	1	1	4	5960;3614;51;6274	47 (47)	0.00524	0.0539	0.0327	0.135
Signaling by Rho GTPases	Reactome	0		688 (689)	1	1	3	1110;444899;51	24 (29)	0.00533	0.0539	0.0332	0.135
RHO GTPase Effectors	Reactome	0		313 (314)	1	1	3	1110;444899;51	24 (29)	0.00533	0.0539	0.0332	0.135
Signaling by Rho GTPases_ Miro GTPases and RHOBTB3	Reactome	0		704 (705)	1	1	3	1110;444899;51	24 (29)	0.00533	0.0539	0.0332	0.135
Aspartate and asparagine metabolism	Reactome	0		12 (12)	1	1	3	6083;5960;51	24 (24)	0.00533	0.0539	0.0332	0.135
Glycolysis	SMPDB	0		15 (15)	1	1	3	79025;439153;69507	24 (24)	0.00533	0.0539	0.0332	0.135
Phytanic Acid Peroxisomal Oxidation	SMPDB	0		6 (6)	1	1	3	1110;439153;51	24 (24)	0.00533	0.0539	0.0332	0.135
TCA Cycle (aka Krebs or citric acid cycle)	Wikipathways	0		17 (17)	1	1	3	1110;439153;51	24 (24)	0.00533	0.0539	0.0332	0.135
Methionine salvage	HumanCyc	0		3 (3)	1	1	2	6137;247	8 (8)	0.00595	0.0578	0.0364	0.142
Threonine degradation	HumanCyc	0		6 (6)	1	1	2	439153;6288	8 (8)	0.00595	0.0578	0.0364	0.142
4-hydroxy-2-nonenal detoxification	HumanCyc	0		5 (5)	1	1	2	750;124886	8 (8)	0.00595	0.0578	0.0364	0.142
Glycine cleavage	HumanCyc	0		3 (3)	1	1	2	439153;750	8 (8)	0.00595	0.0578	0.0364	0.142
Lipoate biosynthesis and incorporation	HumanCyc	0		3 (3)	1	1	2	6083;6137	8 (8)	0.00595	0.0578	0.0364	0.142
Arginine and proline metabolism - Homo sapiens (human)	KEGG	0		50 (51)	1	1	5	6262;1176;145742;1088;500	77 (78)	0.00582	0.0578	0.0358	0.142
Glucagon signaling pathway - Homo sapiens (human)	KEGG	0		107 (107)	1	1	3	1110;69507;51	25 (26)	0.00599	0.0578	0.0367	0.142
ALKBH2 mediated reversal of alkylation damage	Reactome	0		1 (1)	1	1	2	1110;51	8 (9)	0.00595	0.0578	0.0364	0.142
ALKBH3 mediated reversal of alkylation damage	Reactome	0		4 (4)	1	1	2	1110;51	8 (9)	0.00595	0.0578	0.0364	0.142
Mitochondrial biogenesis	Reactome	0		53 (53)	1	1	2	6083;936	8 (8)	0.00595	0.0578	0.0364	0.142
mRNA decay by 3_ to 5_ exoribonuclease	Reactome	0		16 (16)	1	1	2	6083;6030	8 (10)	0.00595	0.0578	0.0364	0.142
Deadenylation-dependent mRNA decay	Reactome	0		56 (56)	1	1	2	6083;6030	8 (11)	0.00595	0.0578	0.0364	0.142
Conjugation of benzoate with glycine	Reactome	0		6 (6)	1	1	2	6083;750	8 (8)	0.00595	0.0578	0.0364	0.142
Conjugation of salicylate with glycine	Reactome	0		8 (8)	1	1	2	6083;750	8 (8)	0.00595	0.0578	0.0364	0.142
Biosynthesis of maresin conjugates in tissue regeneration (MCTR)	Reactome	0		2 (2)	1	1	2	750;124886	8 (9)	0.00595	0.0578	0.0364	0.142
Biosynthesis of EPA-derived SPMs	Reactome	0		6 (6)	1	1	3	439153;124886;446284	25 (28)	0.00599	0.0578	0.0367	0.142
The canonical retinoid cycle in rods (twilight vision)	Reactome	0		21 (21)	1	1	3	985;439153;5281	25 (34)	0.00599	0.0578	0.0367	0.142
Oxidation of Branched Chain Fatty Acids	SMPDB	0		12 (12)	1	1	3	1110;10917;51	25 (25)	0.00599	0.0578	0.0367	0.142
Membrane Trafficking	Reactome	1	LMAN2L	578 (578)	0.197	1	2	6083;10747814	19 (31)	0.0326	0.196	0.0389	0.15
Cytoprotection by HMOX1	Reactome	0		65 (65)	1	1	3	985;444899;446284	26 (29)	0.0067	0.0641	0.0403	0.153
Cysteine Metabolism	SMPDB	0		9 (9)	1	1	3	6083;439153;51	26 (26)	0.0067	0.0641	0.0403	0.153
7-(3-amino-3-carboxypropyl)-wyosine biosynthesis	HumanCyc	0		2 (2)	1	1	2	439155;6137	9 (9)	0.00757	0.0697	0.0445	0.164
Butosine biosynthesis	HumanCyc	0		3 (3)	1	1	2	439155;6137	9 (9)	0.00757	0.0697	0.0445	0.164
Glutathione biosynthesis	HumanCyc	0		3 (3)	1	1	2	750;124886	9 (9)	0.00757	0.0697	0.0445	0.164
Glutamate biosynthesis/degradation	HumanCyc	0		3 (3)	1	1	2	439153;51	9 (9)	0.00757	0.0697	0.0445	0.164
GABAergic synapse - Homo sapiens (human)	KEGG	0		89 (89)	1	1	2	1110;51	9 (9)	0.00757	0.0697	0.0445	0.164
Fatty acid metabolism	Reactome	0		176 (177)	1	1	9	6083;985;439153;750;51;10747814;444899;1110;124886	231 (257)	0.00744	0.0697	0.0439	0.164
Peroxisomal lipid metabolism	Reactome	0		30 (30)	1	1	4	6083;1110;439153;51	52 (61)	0.00751	0.0697	0.0442	0.164
Glycerophospholipid biosynthesis	Reactome	0		130 (130)	1	1	4	439155;439153;123874;10747814	52 (94)	0.00751	0.0697	0.0442	0.164
TCF dependent signaling in response to WNT	Reactome	0		190 (191)	1	1	2	439155;936	9 (11)	0.00757	0.0697	0.0445	0.164
TET1_2_3 and TDG demethylate DNA	Reactome	0		4 (4)	1	1	2	1110;51	9 (12)	0.00757	0.0697	0.0445	0.164
Glycine degradation	Reactome	0		4 (4)	1	1	2	439153;750	9 (11)	0.00757	0.0697	0.0445	0.164
Phospholipid Biosynthesis	SMPDB	0		28 (28)	1	1	3	439153;123874;10747814	27 (27)	0.00746	0.0697	0.044	0.164
Gamma-glutamyl cycle for the biosynthesis and degradation of glutathione_ including diseases	Wikipathways	0		4 (4)	1	1	2	124886;750	9 (12)	0.00757	0.0697	0.0445	0.164
Alanine_ aspartate and glutamate metabolism - Homo sapiens (human)	KEGG	0		37 (37)	1	1	3	1110;5960;51	28 (28)	0.00827	0.0758	0.0479	0.175
Gamma carboxylation_ hypusine formation and arylsulfatase activation	Reactome	0		41 (41)	1	1	3	6083;439155;439153	28 (34)	0.00827	0.0758	0.0479	0.175
Pyrimidine nucleotides nucleosides metabolism	INOH	0		51 (51)	1	1	4	6083;6030;5960;51	54 (56)	0.00858	0.0784	0.0494	0.18
Actions of nitric oxide in the heart	BioCarta	0		42 (42)	1	1	2	9750;6083	10 (10)	0.00937	0.0804	0.0531	0.181
Ascorbate recycling (cytosolic)	HumanCyc	0		2 (2)	1	1	2	439153;124886	10 (10)	0.00937	0.0804	0.0531	0.181
Proline degradation	HumanCyc	0		2 (2)	1	1	2	439153;145742	10 (10)	0.00937	0.0804	0.0531	0.181
tRNA splicing	HumanCyc	0		5 (5)	1	1	2	6083;936	10 (11)	0.00937	0.0804	0.0531	0.181
Asparagine degradation	HumanCyc	0		5 (5)	1	1	2	5960;51	10 (10)	0.00937	0.0804	0.0531	0.181
Ketolysis	HumanCyc	0		5 (5)	1	1	2	1110;439153	10 (10)	0.00937	0.0804	0.0531	0.181
Retinoid metabolism and transport	Reactome	0		45 (45)	1	1	3	985;439153;5281	29 (37)	0.00912	0.0804	0.052	0.181
Visual phototransduction	Reactome	0		103 (103)	1	1	4	439155;439153;5281;985	55 (68)	0.00915	0.0804	0.0521	0.181
Phospholipid metabolism	Reactome	0		213 (213)	1	1	4	439155;439153;123874;10747814	55 (104)	0.00915	0.0804	0.0521	0.181
Reversal of alkylation damage by DNA dioxygenases	Reactome	0		7 (7)	1	1	2	1110;51	10 (11)	0.00937	0.0804	0.0531	0.181
Fructose biosynthesis	Reactome	0		2 (2)	1	1	2	79025;439153	10 (10)	0.00937	0.0804	0.0531	0.181
N-glycan trimming in the ER and Calnexin/Calreticulin cycle	Reactome	0		33 (33)	1	1	2	18950;79025	10 (25)	0.00937	0.0804	0.0531	0.181
Collagen biosynthesis and modifying enzymes	Reactome	0		67 (67)	1	1	2	1110;51	10 (10)	0.00937	0.0804	0.0531	0.181
Utilization of Ketone Bodies	Reactome	0		4 (4)	1	1	2	1110;439153	10 (10)	0.00937	0.0804	0.0531	0.181
Vitamin B2 (riboflavin) metabolism	Reactome	0		7 (7)	1	1	2	6083;493570	10 (10)	0.00937	0.0804	0.0531	0.181
Regulation of TP53 Activity	Reactome	0		163 (163)	1	1	2	6083;439155	10 (15)	0.00937	0.0804	0.0531	0.181
Pentose Phosphate Pathway	SMPDB	0		14 (14)	1	1	3	6083;69507;439236	29 (29)	0.00912	0.0804	0.052	0.181
Starch and Sucrose Metabolism	SMPDB	0		18 (18)	1	1	3	79025;439153;444791	29 (29)	0.00912	0.0804	0.052	0.181
Ferroptosis	Wikipathways	0		40 (40)	1	1	3	124886;14985;444899	29 (29)	0.00912	0.0804	0.052	0.181
Electron Transport Chain (OXPHOS system in mitochondria)	Wikipathways	0		103 (103)	1	1	2	1110;439153	10 (12)	0.00937	0.0804	0.0531	0.181
Valine_ leucine and isoleucine degradation	EHMN	0		49 (49)	1	1	4	6083;439153;6137;51	56 (62)	0.00974	0.083	0.0548	0.186
Sensory Perception	Reactome	0		585 (585)	1	1	4	439155;439153;5281;985	56 (69)	0.00974	0.083	0.0548	0.186
Folate Metabolism	Wikipathways	0		69 (69)	1	1	4	750;6137;493570;439155	56 (66)	0.00974	0.083	0.0548	0.186
Glutathione metabolism - Homo sapiens (human)	KEGG	0		57 (57)	1	1	3	6262;124886;750	30 (38)	0.01	0.0849	0.0562	0.189
Citric acid cycle (TCA cycle)	Reactome	0		22 (22)	1	1	3	1110;439153;51	30 (31)	0.01	0.0849	0.0562	0.189
Beta integrin cell surface interactions	PID	1	THY1	29 (29)	0.0107	1	0		1 (1)	1	1	0.0595	0.199
Pyruvate metabolism	INOH	0		34 (34)	1	1	3	6083;439153;124886	31 (31)	0.011	0.0924	0.0605	0.201
Pentose phosphate pathway	Reactome	0		15 (15)	1	1	3	6083;69507;439236	31 (31)	0.011	0.0924	0.0605	0.201
Synthesis of Leukotrienes (LT) and Eoxins (EX)	Reactome	0		21 (21)	1	1	3	750;124886;444899	31 (32)	0.011	0.0924	0.0605	0.201
Beta-alanine degradation	HumanCyc	0		2 (2)	1	1	2	439153;51	11 (11)	0.0113	0.0931	0.0621	0.202
Urate biosynthesis/inosine 5_-phosphate degradation	HumanCyc	0		6 (6)	1	1	2	439153;439236	11 (11)	0.0113	0.0931	0.0621	0.202
Serine biosynthesis (phosphorylated route)	HumanCyc	0		4 (4)	1	1	2	439153;51	11 (11)	0.0113	0.0931	0.0621	0.202
DNA Damage Reversal	Reactome	0		8 (8)	1	1	2	1110;51	11 (12)	0.0113	0.0931	0.0621	0.202
Proline catabolism	Reactome	0		3 (3)	1	1	2	439153;145742	11 (11)	0.0113	0.0931	0.0621	0.202
Glycogen breakdown (glycogenolysis)	Reactome	0		17 (17)	1	1	2	6083;79025	11 (11)	0.0113	0.0931	0.0621	0.202
Activated PKN1 stimulates transcription of AR (androgen receptor) regulated genes KLK2 and KLK3	Reactome	0		70 (71)	1	1	2	1110;51	11 (11)	0.0113	0.0931	0.0621	0.202
Glucose-Alanine Cycle	SMPDB	0		8 (8)	1	1	2	439153;51	11 (11)	0.0113	0.0931	0.0621	0.202
TCA cycle in senescence	Wikipathways	0		10 (10)	1	1	2	439153;51	11 (13)	0.0113	0.0931	0.0621	0.202
Amino acid conjugation of benzoic acid	Wikipathways	0		4 (4)	1	1	2	6083;750	11 (11)	0.0113	0.0931	0.0621	0.202
Amb2 Integrin signaling	PID	1	THY1	31 (31)	0.0115	1	0		2 (2)	1	1	0.0628	0.203
Activation of kainate receptors upon glutamate binding	Reactome	1	NCALD	32 (32)	0.0119	1	0		4 (4)	1	1	0.0644	0.208
beta-Alanine metabolism - Homo sapiens (human)	KEGG	0		30 (30)	1	1	3	5960;867;6274	32 (32)	0.012	0.0981	0.065	0.209
Tolerance by Mtb to nitric oxide produced by macrophages	Reactome	0		0 (0)	1	1	2	439153;124886	20 (26)	0.0359	0.211	0.0359	0.211
Cargo concentration in the ER	Reactome	1	LMAN2L	33 (33)	0.0122	1	0		1 (6)	1	1	0.0661	0.212
Fructose Mannose metabolism	INOH	0		30 (30)	1	1	3	18950;439153;69507	33 (33)	0.013	0.105	0.0697	0.219
Fatty acyl-CoA biosynthesis	Reactome	0		37 (37)	1	1	3	6083;985;444899	33 (42)	0.013	0.105	0.0697	0.219
Citric Acid Cycle	SMPDB	0		21 (21)	1	1	3	1110;439153;51	33 (33)	0.013	0.105	0.0697	0.219
Mono-unsaturated fatty acid beta-oxidation	EHMN	0		21 (21)	1	1	2	6083;439153	12 (12)	0.0135	0.106	0.0715	0.221
Phytol degradation	HumanCyc	0		2 (2)	1	1	2	6083;439153	12 (14)	0.0135	0.106	0.0715	0.221
Adenosine ribonucleotides de novo biosynthesis	HumanCyc	0		38 (38)	1	1	2	6083;5960	12 (12)	0.0135	0.106	0.0715	0.221
Guanosine nucleotides degradation	HumanCyc	0		4 (4)	1	1	2	439153;439236	12 (12)	0.0135	0.106	0.0715	0.221
Ethanol degradation II	HumanCyc	0		8 (8)	1	1	2	6083;439153	12 (12)	0.0135	0.106	0.0715	0.221
Regulation of lipolysis in adipocytes - Homo sapiens (human)	KEGG	0		55 (57)	1	1	2	6083;444899	12 (14)	0.0135	0.106	0.0715	0.221
Protein repair	Reactome	0		6 (6)	1	1	2	439155;5960	12 (13)	0.0135	0.106	0.0715	0.221
Axon guidance	Reactome	0		356 (356)	1	1	2	985;750	12 (17)	0.0135	0.106	0.0715	0.221
Nervous system development	Reactome	0		379 (379)	1	1	2	985;750	12 (17)	0.0135	0.106	0.0715	0.221
Pyrimidine metabolism - Homo sapiens (human)	KEGG	0		57 (57)	1	1	4	1176;6030;597;867	63 (65)	0.0146	0.115	0.0763	0.235
Stress induction of hsp regulation	BioCarta	0		14 (14)	1	1	1	124886	1 (1)	0.0151	0.117	0.0785	0.238
Tyrosine metabolism	EHMN	0		108 (108)	1	1	5	6083;439155;439153;124886;51	97 (105)	0.015	0.117	0.0782	0.238
Ethanol degradation IV	HumanCyc	0		6 (6)	1	1	2	6083;439153	13 (13)	0.0158	0.118	0.0812	0.238
Citrate cycle	INOH	0		32 (32)	1	1	3	1110;439153;51	35 (35)	0.0153	0.117	0.0793	0.238
Progressive trimming of alpha-1_2-linked mannose residues from Man9/8/7GlcNAc2 to produce Man5GlcNAc2	Reactome	0		3 (3)	1	1	1	18950	1 (7)	0.0151	0.117	0.0785	0.238
PI and PC transport between ER and Golgi membranes	Reactome	0		1 (1)	1	1	1	10747814	1 (2)	0.0151	0.117	0.0785	0.238
Vitamin E	Reactome	0		1 (1)	1	1	1	14985	1 (1)	0.0151	0.117	0.0785	0.238
Respiratory electron transport	Reactome	0		89 (89)	1	1	2	6083;439153	13 (17)	0.0158	0.118	0.0812	0.238
DNA Double-Strand Break Repair	Reactome	0		168 (169)	1	1	2	439155;936	13 (17)	0.0158	0.118	0.0812	0.238
Synthesis of 12-eicosatetraenoic acid derivatives	Reactome	0		7 (7)	1	1	2	124886;444899	13 (13)	0.0158	0.118	0.0812	0.238
Synthesis of DNA	Reactome	0		76 (76)	1	1	2	6083;6030	13 (15)	0.0158	0.118	0.0812	0.238
Processive synthesis on the C-strand of the telomere	Reactome	0		19 (19)	1	1	2	6083;6030	13 (17)	0.0158	0.118	0.0812	0.238
Ketone Body Metabolism	SMPDB	0		5 (5)	1	1	2	1110;439153	13 (13)	0.0158	0.118	0.0812	0.238
Omega-9 FA synthesis	Wikipathways	0		12 (12)	1	1	1	5281116	1 (1)	0.0151	0.117	0.0785	0.238
Endothelin Pathways	Wikipathways	0		33 (33)	1	1	2	9750;444899	13 (13)	0.0158	0.118	0.0812	0.238
TCA cycle	EHMN	0		30 (30)	1	1	3	1110;439153;51	36 (36)	0.0165	0.123	0.0844	0.246
Galactose Metabolism	SMPDB	0		13 (13)	1	1	3	18950;439153;79025	36 (36)	0.0165	0.123	0.0844	0.246
Vitamin B2 (riboflavin) metabolism	EHMN	0		5 (5)	1	1	2	6083;493570	14 (14)	0.0182	0.131	0.0912	0.255
Proline biosynthesis	HumanCyc	0		4 (4)	1	1	2	439153;145742	14 (14)	0.0182	0.131	0.0912	0.255
Glutathione-mediated detoxification	HumanCyc	0		22 (22)	1	1	2	750;124886	14 (14)	0.0182	0.131	0.0912	0.255
Phenylalanine degradation	INOH	0		13 (13)	1	1	2	439153;51	14 (14)	0.0182	0.131	0.0912	0.255
Olfactory transduction - Homo sapiens (human)	KEGG	1	NCALD	440 (443)	0.153	1	1	6083	8 (8)	0.115	0.425	0.0887	0.255
Neurotransmitter receptors and postsynaptic signal transmission	Reactome	1	NCALD	185 (185)	0.067	1	1	750	20 (24)	0.263	0.752	0.0888	0.255
Beta oxidation of butanoyl-CoA to acetyl-CoA	Reactome	0		5 (5)	1	1	2	6083;439153	14 (14)	0.0182	0.131	0.0912	0.255
RHO GTPases activate PKNs	Reactome	0		96 (97)	1	1	2	1110;51	14 (15)	0.0182	0.131	0.0912	0.255
Threonine catabolism	Reactome	0		5 (5)	1	1	2	439153;750	14 (14)	0.0182	0.131	0.0912	0.255
Synthesis of Ketone Bodies	Reactome	0		8 (8)	1	1	2	6083;439153	14 (14)	0.0182	0.131	0.0912	0.255
Glutathione synthesis and recycling	Reactome	0		13 (13)	1	1	2	750;124886	14 (14)	0.0182	0.131	0.0912	0.255
Organelle biogenesis and maintenance	Reactome	0		231 (231)	1	1	2	6083;936	14 (16)	0.0182	0.131	0.0912	0.255
DNA Replication	Reactome	0		81 (81)	1	1	2	6083;6030	14 (17)	0.0182	0.131	0.0912	0.255
Free fatty acids regulate insulin secretion	Reactome	0		11 (11)	1	1	2	6083;985	14 (17)	0.0182	0.131	0.0912	0.255
Synthesis of wybutosine at G37 of tRNA(Phe)	Reactome	0		6 (6)	1	1	2	439155;51	14 (15)	0.0182	0.131	0.0912	0.255
Tyrosine Metabolism	SMPDB	0		18 (18)	1	1	4	439155;439153;5960;51	67 (67)	0.018	0.131	0.0901	0.255
Glutathione metabolism	Wikipathways	0		20 (20)	1	1	2	124886;750	14 (19)	0.0182	0.131	0.0912	0.255
Valine Leucine Isoleucine degradation	INOH	0		32 (32)	1	1	3	1110;439153;51	38 (40)	0.0191	0.136	0.0948	0.262
Propanoate Metabolism	SMPDB	0		14 (14)	1	1	3	6083;439153;51	38 (38)	0.0191	0.136	0.0948	0.262
Cardiac Progenitor Differentiation	Wikipathways	1	THY1	53 (53)	0.0196	1	0		1 (1)	1	1	0.0966	0.267
Oxidative ethanol degradation III	HumanCyc	0		7 (7)	1	1	2	6083;439153	15 (15)	0.0208	0.145	0.101	0.275
Guanosine ribonucleotides de novo biosynthesis	HumanCyc	0		13 (13)	1	1	2	6083;439153	15 (15)	0.0208	0.145	0.101	0.275
Oxidative phosphorylation - Homo sapiens (human)	KEGG	0		133 (133)	1	1	2	1110;439153	15 (16)	0.0208	0.145	0.101	0.275
Collagen formation	Reactome	0		91 (91)	1	1	2	1110;51	15 (16)	0.0208	0.145	0.101	0.275
Ethanol oxidation	Reactome	0		12 (12)	1	1	2	6083;439153	15 (15)	0.0208	0.145	0.101	0.275
Conjugation of carboxylic acids	Reactome	0		9 (9)	1	1	2	6083;750	15 (16)	0.0208	0.145	0.101	0.275
Amino Acid conjugation	Reactome	0		9 (9)	1	1	2	6083;750	15 (16)	0.0208	0.145	0.101	0.275
Miscellaneous substrates	Reactome	0		12 (12)	1	1	2	301590;444899	15 (15)	0.0208	0.145	0.101	0.275
Serine biosynthesis	Reactome	0		9 (9)	1	1	2	439153;51	15 (15)	0.0208	0.145	0.101	0.275
NO-cGMP-PKG mediated Neuroprotection	Wikipathways	0		47 (47)	1	1	2	6083;9750	15 (15)	0.0208	0.145	0.101	0.275
Vitamin K metabolism	EHMN	0		0 (0)	1	1	1	439153	4 (5)	0.0591	0.291	0.0591	0.291
Omega-3 fatty acid metabolism	EHMN	0		16 (16)	1	1	2	6083;439153	16 (16)	0.0236	0.159	0.112	0.292
Lysine degradation I (saccharopine pathway)	HumanCyc	0		4 (4)	1	1	2	439153;51	16 (16)	0.0236	0.159	0.112	0.292
(S)-reticuline biosynthesis	HumanCyc	0		1 (1)	1	1	2	439155;51	16 (16)	0.0236	0.159	0.112	0.292
Isoleucine degradation	HumanCyc	0		12 (12)	1	1	2	439153;51	16 (16)	0.0236	0.159	0.112	0.292
Arachidonic acid metabolism	Reactome	0		60 (60)	1	1	5	124886;439153;750;444899;10747814	108 (114)	0.0229	0.159	0.109	0.292
Phase II - Conjugation of compounds	Reactome	0		111 (111)	1	1	6	6083;439155;439153;750;444791;124886	148 (149)	0.0235	0.159	0.112	0.292
Synthesis of 5-eicosatetraenoic acids	Reactome	0		9 (9)	1	1	2	124886;444899	16 (17)	0.0236	0.159	0.112	0.292
Biosynthesis of protectin and resolvin conjugates in tissue regeneration (PCTR and RCTR)	Reactome	0		1 (1)	1	1	2	750;124886	16 (18)	0.0236	0.159	0.112	0.292
Telomere Maintenance	Reactome	0		104 (105)	1	1	2	6083;6030	16 (21)	0.0236	0.159	0.112	0.292
Tyrosine catabolism	Reactome	0		5 (5)	1	1	2	124886;51	16 (16)	0.0236	0.159	0.112	0.292
Base-Excision Repair_ AP Site Formation	Reactome	0		66 (67)	1	1	2	190;790	16 (18)	0.0236	0.159	0.112	0.292
Telomere C-strand (Lagging Strand) Synthesis	Reactome	0		35 (35)	1	1	2	6083;6030	16 (20)	0.0236	0.159	0.112	0.292
Extension of Telomeres	Reactome	0		51 (51)	1	1	2	6083;6030	16 (20)	0.0236	0.159	0.112	0.292
Chromosome Maintenance	Reactome	0		133 (134)	1	1	2	6083;6030	16 (22)	0.0236	0.159	0.112	0.292
Formation of xylulose-5-phosphate	Reactome	0		5 (5)	1	1	2	439153;444791	16 (17)	0.0236	0.159	0.112	0.292
COPII-mediated vesicle transport	Reactome	1	LMAN2L	68 (68)	0.0251	1	0		6 (11)	1	1	0.117	0.306
Saturated fatty acids beta-oxidation	EHMN	0		25 (25)	1	1	3	985;439153;10917	43 (43)	0.0265	0.176	0.123	0.314
4-hydroxyproline degradation	HumanCyc	0		4 (4)	1	1	2	439153;51	17 (17)	0.0265	0.175	0.123	0.314
Eicosapentaenoate biosynthesis	HumanCyc	0		13 (13)	1	1	2	6083;446284	17 (17)	0.0265	0.175	0.123	0.314
Guanosine nucleotides de novo biosynthesis	HumanCyc	0		16 (16)	1	1	2	6083;439153	17 (17)	0.0265	0.175	0.123	0.314
Dopamine degradation	HumanCyc	0		7 (7)	1	1	2	439155;439153	17 (17)	0.0265	0.175	0.123	0.314
Vitamin B6 metabolism	INOH	0		4 (4)	1	1	2	1053;51	17 (17)	0.0265	0.175	0.123	0.314
Citrate cycle (TCA cycle) - Homo sapiens (human)	KEGG	0		30 (30)	1	1	2	1110;51	17 (20)	0.0265	0.175	0.123	0.314
Proximal tubule bicarbonate reclamation - Homo sapiens (human)	KEGG	0		23 (23)	1	1	2	79025;51	17 (17)	0.0265	0.175	0.123	0.314
S Phase	Reactome	0		104 (104)	1	1	2	6083;6030	17 (21)	0.0265	0.175	0.123	0.314
Metabolism of lipids	Reactome	0		645 (646)	1	1	14	79025;6083;439155;439153;750;5281;51;10747814;444899;985;1110;124886;123874;446284	535 (626)	0.027	0.178	0.124	0.318
Ras signaling pathway	BioCarta	0		20 (20)	1	1	1	10747814	2 (2)	0.03	0.186	0.135	0.325
Basic mechanisms of sumoylation	BioCarta	0		6 (6)	1	1	1	6083	2 (2)	0.03	0.186	0.135	0.325
Porphyrin metabolism	EHMN	0		34 (34)	1	1	3	439153;750;444791	44 (48)	0.0282	0.185	0.129	0.325
Bile acid biosynthesis_ neutral pathway	HumanCyc	0		15 (15)	1	1	3	6083;439153;750	44 (44)	0.0282	0.185	0.129	0.325
Folate metabolism	INOH	0		31 (31)	1	1	3	6137;439153;750	44 (46)	0.0282	0.185	0.129	0.325
Retrograde endocannabinoid signaling - Homo sapiens (human)	KEGG	0		148 (148)	1	1	2	444899;10747814	18 (19)	0.0295	0.186	0.133	0.325
PI3K-Akt signaling pathway - Homo sapiens (human)	KEGG	0		353 (354)	1	1	1	6083	2 (4)	0.03	0.186	0.135	0.325
Vitamin C (ascorbate) metabolism	Reactome	0		8 (8)	1	1	2	439153;124886	18 (18)	0.0295	0.186	0.133	0.325
PIWI-interacting RNA (piRNA) biogenesis	Reactome	0		14 (14)	1	1	1	439155	2 (3)	0.03	0.186	0.135	0.325
Protein-protein interactions at synapses	Reactome	0		88 (88)	1	1	1	750	2 (2)	0.03	0.186	0.135	0.325
NoRC negatively regulates rRNA expression	Reactome	0		80 (81)	1	1	1	439155	2 (5)	0.03	0.186	0.135	0.325
DNA Damage Recognition in GG-NER	Reactome	0		24 (24)	1	1	1	936	2 (3)	0.03	0.186	0.135	0.325
ERCC6 (CSB) and EHMT2 (G9a) positively regulate rRNA expression	Reactome	0		79 (80)	1	1	1	439155	2 (3)	0.03	0.186	0.135	0.325
Deadenylation of mRNA	Reactome	0		25 (25)	1	1	1	6083	2 (4)	0.03	0.186	0.135	0.325
RUNX1 regulates genes involved in megakaryocyte differentiation and platelet function	Reactome	0		94 (95)	1	1	1	439155	2 (2)	0.03	0.186	0.135	0.325
Meiotic recombination	Reactome	0		66 (67)	1	1	1	439155	2 (4)	0.03	0.186	0.135	0.325
PKMTs methylate histone lysines	Reactome	0		73 (73)	1	1	1	439155	2 (2)	0.03	0.186	0.135	0.325
rRNA processing in the mitochondrion	Reactome	0		6 (6)	1	1	1	439155	2 (5)	0.03	0.186	0.135	0.325
Protein methylation	Reactome	0		20 (20)	1	1	1	439155	2 (2)	0.03	0.186	0.135	0.325
Degradation of AXIN	Reactome	0		10 (10)	1	1	1	936	2 (2)	0.03	0.186	0.135	0.325
rRNA modification in the mitochondrion	Reactome	0		6 (6)	1	1	1	439155	2 (5)	0.03	0.186	0.135	0.325
PRC2 methylates histones and DNA	Reactome	0		76 (77)	1	1	1	439155	2 (3)	0.03	0.186	0.135	0.325
Proton/oligopeptide cotransporters	Reactome	0		4 (4)	1	1	1	6274	2 (5)	0.03	0.186	0.135	0.325
Synaptic adhesion-like molecules	Reactome	0		21 (21)	1	1	1	750	2 (2)	0.03	0.186	0.135	0.325
Mitochondrial Electron Transport Chain	SMPDB	0		20 (20)	1	1	2	1110;439153	18 (18)	0.0295	0.186	0.133	0.325
Spermidine and Spermine Biosynthesis	SMPDB	0		6 (6)	1	1	2	6262;6137	18 (18)	0.0295	0.186	0.133	0.325
PI3K-Akt signaling pathway	Wikipathways	0		339 (340)	1	1	1	6083	2 (4)	0.03	0.186	0.135	0.325
Relationship between inflammation_ COX-2 and EGFR	Wikipathways	0		25 (25)	1	1	1	444899	2 (2)	0.03	0.186	0.135	0.325
Nucleotide GPCRs	Wikipathways	0		11 (11)	1	1	1	190	2 (2)	0.03	0.186	0.135	0.325
Caloric restriction and aging	Wikipathways	0		9 (9)	1	1	1	6083	2 (3)	0.03	0.186	0.135	0.325
TNF-alpha signaling pathway	Wikipathways	0		93 (93)	1	1	1	444899	2 (3)	0.03	0.186	0.135	0.325
Galactose metabolism - Homo sapiens (human)	KEGG	0		31 (31)	1	1	3	18950;69507;79025	46 (46)	0.0316	0.193	0.141	0.333
Synthesis of Prostaglandins (PG) and Thromboxanes (TX)	Reactome	0		16 (16)	1	1	3	439153;124886;444899	46 (50)	0.0316	0.193	0.141	0.333
Signaling by Nuclear Receptors	Reactome	0		294 (295)	1	1	3	9750;439155;439153	46 (49)	0.0316	0.193	0.141	0.333
Pyruvate Metabolism	SMPDB	0		22 (22)	1	1	3	6083;439153;124886	46 (46)	0.0316	0.193	0.141	0.333
Di-unsaturated fatty acid beta-oxidation	EHMN	0		23 (23)	1	1	2	6083;439153	19 (19)	0.0326	0.196	0.144	0.336
Thermogenesis - Homo sapiens (human)	KEGG	0		232 (232)	1	1	2	439153;10917	19 (23)	0.0326	0.196	0.144	0.336
Respiratory electron transport_ ATP synthesis by chemiosmotic coupling_ and heat production by uncoupling proteins.	Reactome	0		113 (113)	1	1	2	6083;439153	19 (25)	0.0326	0.196	0.144	0.336
Biosynthesis of D-series resolvins	Reactome	0		4 (4)	1	1	2	439153;124886	19 (25)	0.0326	0.196	0.144	0.336
Synthesis of PA	Reactome	0		37 (37)	1	1	2	439153;10747814	19 (27)	0.0326	0.196	0.144	0.336
Mitochondrial Beta-Oxidation of Short Chain Saturated Fatty Acids	SMPDB	0		8 (8)	1	1	2	6083;439153	19 (19)	0.0326	0.196	0.144	0.336
Threonine and 2-Oxobutanoate Degradation	SMPDB	0		9 (9)	1	1	2	439153;6288	19 (19)	0.0326	0.196	0.144	0.336
Riboflavin Metabolism	SMPDB	0		5 (5)	1	1	2	6083;493570	19 (19)	0.0326	0.196	0.144	0.336
Amino acid conjugation	Wikipathways	0		0 (0)	1	1	1	750	5 (6)	0.0733	0.341	0.0733	0.341
Urea cycle and associated pathways	Wikipathways	0		0 (0)	1	1	2	1176;51	30 (30)	0.0747	0.345	0.0747	0.345
Post-translational modification: synthesis of GPI-anchored proteins	Reactome	1	THY1	94 (94)	0.0345	1	0		12 (22)	1	1	0.151	0.35
Leucine degradation	HumanCyc	0		12 (12)	1	1	2	439153;51	20 (20)	0.0359	0.211	0.155	0.354
Glycolysis	HumanCyc	0		24 (25)	1	1	2	79025;439153	20 (20)	0.0359	0.211	0.155	0.354
Valine degradation	HumanCyc	0		13 (13)	1	1	2	439153;51	20 (20)	0.0359	0.211	0.155	0.354
UMP biosynthesis	HumanCyc	0		2 (2)	1	1	2	6030;5960	20 (20)	0.0359	0.211	0.155	0.354
Noradrenaline and adrenaline degradation	HumanCyc	0		13 (13)	1	1	2	439155;439153	20 (20)	0.0359	0.211	0.155	0.354
AMPK signaling pathway - Homo sapiens (human)	KEGG	0		120 (120)	1	1	2	6083;69507	20 (23)	0.0359	0.211	0.155	0.354
Interconversion of nucleotide di- and triphosphates	Reactome	0		32 (32)	1	1	3	6083;6030;124886	48 (52)	0.0352	0.211	0.153	0.354
Fructose metabolism	Reactome	0		7 (7)	1	1	2	79025;439153	20 (20)	0.0359	0.211	0.155	0.354
Biosynthesis of DHA-derived sulfido conjugates	Reactome	0		2 (2)	1	1	2	750;124886	20 (22)	0.0359	0.211	0.155	0.354
Recycling of bile acids and salts	Reactome	0		16 (16)	1	1	2	6083;750	20 (20)	0.0359	0.211	0.155	0.354
Nucleotide Sugars Metabolism	SMPDB	0		8 (8)	1	1	2	79025;439153	20 (20)	0.0359	0.211	0.155	0.354
Computational Model of Aerobic Glycolysis	Wikipathways	0		12 (12)	1	1	2	6083;439153	20 (20)	0.0359	0.211	0.155	0.354
Biological oxidations	Reactome	0		219 (219)	1	1	9	6083;439155;439153;750;444791;439924;301590;444899;124886	302 (320)	0.0367	0.215	0.158	0.359
Synthesis of bile acids and bile salts via 7alpha-hydroxycholesterol	Reactome	0		20 (20)	1	1	3	6083;439153;750	49 (49)	0.0371	0.217	0.159	0.361
Purine catabolism	Reactome	0		18 (18)	1	1	3	6083;790;439236	49 (51)	0.0371	0.217	0.159	0.361
Glycolysis and Gluconeogenesis	EHMN	0		66 (67)	1	1	3	6083;79025;439153	50 (52)	0.0391	0.228	0.166	0.374
Lysine degradation II (pipecolate pathway)	HumanCyc	0		6 (6)	1	1	2	439153;51	21 (21)	0.0393	0.228	0.167	0.374
Developmental Biology	Reactome	0		676 (676)	1	1	2	985;750	21 (30)	0.0393	0.228	0.167	0.374
Extra-nuclear estrogen signaling	Reactome	0		73 (73)	1	1	2	9750;439155	21 (24)	0.0393	0.228	0.167	0.374
Proximal tubule transport	Wikipathways	0		57 (57)	1	1	2	750;51	21 (28)	0.0393	0.228	0.167	0.374
Glycerophospholipid Biosynthetic Pathway	Wikipathways	0		0 (0)	1	1	2	439155;439153	34 (49)	0.0927	0.39	0.0927	0.39
Leukocyte transendothelial migration - Homo sapiens (human)	KEGG	1	THY1	114 (114)	0.0417	1	0		3 (4)	1	1	0.174	0.391
Signaling by WNT	Reactome	0		281 (282)	1	1	2	439155;936	22 (26)	0.0428	0.244	0.178	0.393
Phenylalanine metabolism	Reactome	0		8 (8)	1	1	2	439153;5960	22 (22)	0.0428	0.244	0.178	0.393
Heparan sulfate/heparin (HS-GAG) metabolism	Reactome	0		54 (54)	1	1	2	6030;444791	22 (34)	0.0428	0.244	0.178	0.393
Pyrimidine biosynthesis	Reactome	0		3 (3)	1	1	2	6030;5960	22 (22)	0.0428	0.244	0.178	0.393
Intracellular signaling by second messengers	Reactome	0		259 (259)	1	1	2	6083;936	22 (28)	0.0428	0.244	0.178	0.393
Glutathione Metabolism	SMPDB	0		11 (11)	1	1	2	750;124886	22 (22)	0.0428	0.244	0.178	0.393
5-Oxoprolinuria	SMPDB	0		11 (11)	1	1	2	750;124886	22 (22)	0.0428	0.244	0.178	0.393
Hemoglobins chaperone	BioCarta	0		13 (13)	1	1	1	750	3 (3)	0.0447	0.249	0.184	0.395
No2-dependent il-12 pathway in nk cells	BioCarta	0		9 (9)	1	1	1	9750	3 (3)	0.0447	0.249	0.184	0.395
mTOR signaling pathway - Homo sapiens (human)	KEGG	0		154 (155)	1	1	1	6083	3 (4)	0.0447	0.249	0.184	0.395
rRNA processing	Reactome	0		63 (64)	1	1	1	439155	3 (11)	0.0447	0.249	0.184	0.395
DNA methylation	Reactome	0		68 (69)	1	1	1	439155	3 (5)	0.0447	0.249	0.184	0.395
Activation of PPARGC1A (PGC-1alpha) by phosphorylation	Reactome	0		10 (10)	1	1	1	6083	3 (3)	0.0447	0.249	0.184	0.395
AMPK inhibits chREBP transcriptional activation activity	Reactome	0		8 (8)	1	1	1	6083	3 (3)	0.0447	0.249	0.184	0.395
Regulation of TP53 Activity through Phosphorylation	Reactome	0		93 (93)	1	1	1	6083	3 (4)	0.0447	0.249	0.184	0.395
ISG15 antiviral mechanism	Reactome	0		30 (30)	1	1	1	6083	3 (4)	0.0447	0.249	0.184	0.395
Processing and activation of SUMO	Reactome	0		9 (9)	1	1	1	6083	3 (3)	0.0447	0.249	0.184	0.395
SUMO is conjugated to E1 (UBA2:SAE1)	Reactome	0		5 (5)	1	1	1	6083	3 (3)	0.0447	0.249	0.184	0.395
Cam-PDE 1 activation	Reactome	0		3 (3)	1	1	1	6083	3 (3)	0.0447	0.249	0.184	0.395
Synthesis of active ubiquitin: roles of E1 and E2 enzymes	Reactome	0		31 (31)	1	1	1	6083	3 (3)	0.0447	0.249	0.184	0.395
rRNA modification in the nucleus and cytosol	Reactome	0		57 (58)	1	1	1	439155	3 (11)	0.0447	0.249	0.184	0.395
rRNA processing in the nucleus and cytosol	Reactome	0		57 (58)	1	1	1	439155	3 (11)	0.0447	0.249	0.184	0.395
Phosphatidylcholine catabolism	Wikipathways	0		0 (0)	1	1	1	16219824	7 (9)	0.101	0.397	0.101	0.397
Bile acid biosynthesis	EHMN	0		53 (53)	1	1	3	6083;439153;750	53 (55)	0.0453	0.252	0.185	0.398
Purine metabolism	Wikipathways	0		0 (0)	1	1	2	190;790	36 (36)	0.102	0.401	0.102	0.401
Superpathway of pyrimidine ribonucleotides de novo biosynthesis	HumanCyc	0		15 (15)	1	1	2	6030;5960	23 (23)	0.0464	0.255	0.189	0.402
Prostaglandin Leukotriene metabolism	INOH	0		23 (23)	1	1	2	124886;444899	23 (25)	0.0464	0.255	0.189	0.402
Phosphate bond hydrolysis by NTPDase proteins	Reactome	0		8 (8)	1	1	2	6083;6030	23 (26)	0.0464	0.255	0.189	0.402
Synthesis of PC	Reactome	0		29 (29)	1	1	2	439155;10747814	23 (28)	0.0464	0.255	0.189	0.402
Pyrimidine salvage	Reactome	0		11 (11)	1	1	2	6030;439236	23 (23)	0.0464	0.255	0.189	0.402
Cori Cycle	Wikipathways	0		16 (16)	1	1	2	439153;69507	23 (25)	0.0464	0.255	0.189	0.402
Cysteine and methionine catabolism	Wikipathways	0		0 (0)	1	1	2	51;247	37 (39)	0.107	0.418	0.107	0.418
Androgen and estrogen biosynthesis and metabolism	EHMN	0		87 (87)	1	1	3	439155;439153;124886	55 (62)	0.0496	0.272	0.199	0.419
Propanoate metabolism	INOH	0		25 (25)	1	1	2	6083;439153	24 (26)	0.0502	0.272	0.2	0.419
Nucleobase catabolism	Reactome	0		36 (36)	1	1	4	6083;6030;790;439236	92 (99)	0.0495	0.272	0.198	0.419
ER to Golgi Anterograde Transport	Reactome	1	LMAN2L	136 (136)	0.0496	1	0		6 (11)	1	1	0.199	0.419
Hemostasis	Reactome	0		677 (677)	1	1	3	6083;9750;444899	55 (67)	0.0496	0.272	0.199	0.419
Linoleic acid (LA) metabolism	Reactome	0		8 (8)	1	1	2	6083;439153	24 (24)	0.0502	0.272	0.2	0.419
Extracellular matrix organization	Reactome	0		287 (287)	1	1	2	1110;51	24 (30)	0.0502	0.272	0.2	0.419
Glycerolipid Metabolism	SMPDB	0		13 (13)	1	1	2	985;439153	24 (24)	0.0502	0.272	0.2	0.419
NAD Biosynthesis II (from tryptophan)	Wikipathways	0		8 (8)	1	1	2	6083;161166	24 (24)	0.0502	0.272	0.2	0.419
Cell redox homeostasis	Reactome	0		0 (0)	1	1	1	439153	8 (10)	0.115	0.425	0.115	0.425
Oligodendrocyte specification and differentiation_ leading to myelin components for CNS	Wikipathways	0		0 (0)	1	1	1	10747814	8 (11)	0.115	0.425	0.115	0.425
Regulators of bone mineralization	BioCarta	0		11 (11)	1	1	1	6083	4 (4)	0.0591	0.291	0.226	0.435
Gluconeogenesis	HumanCyc	0		25 (26)	1	1	2	79025;439153	26 (26)	0.058	0.291	0.223	0.435
Putrescine biosynthesis I	HumanCyc	0		1 (1)	1	1	1	6262	4 (4)	0.0591	0.291	0.226	0.435
Histamine biosynthesis	HumanCyc	0		1 (1)	1	1	1	6274	4 (4)	0.0591	0.291	0.226	0.435
Phosphatidylserine biosynthesis I	HumanCyc	0		1 (1)	1	1	1	10747814	4 (4)	0.0591	0.291	0.226	0.435
S-methyl-5-thioadenosine degradation	HumanCyc	0		1 (1)	1	1	1	190	4 (4)	0.0591	0.291	0.226	0.435
Alanine biosynthesis/degradation	HumanCyc	0		2 (2)	1	1	1	51	4 (4)	0.0591	0.291	0.226	0.435
Glycine biosynthesis	HumanCyc	0		2 (2)	1	1	1	750	4 (4)	0.0591	0.291	0.226	0.435
Anandamide degradation	HumanCyc	0		2 (2)	1	1	1	444899	4 (4)	0.0591	0.291	0.226	0.435
Lysosome - Homo sapiens (human)	KEGG	0		128 (128)	1	1	1	18950	4 (4)	0.0591	0.291	0.226	0.435
FoxO signaling pathway - Homo sapiens (human)	KEGG	0		131 (131)	1	1	1	6083	4 (5)	0.0591	0.291	0.226	0.435
Metabolism of folate and pterines	Reactome	0		17 (17)	1	1	2	439153;750	25 (25)	0.054	0.29	0.212	0.435
Pyruvate metabolism	Reactome	0		29 (29)	1	1	2	439153;124886	25 (25)	0.054	0.29	0.212	0.435
Metabolism of nitric oxide: NOS3 activation and regulation	Reactome	0		18 (18)	1	1	2	9750;985	26 (26)	0.058	0.291	0.223	0.435
eNOS activation	Reactome	0		13 (13)	1	1	2	9750;985	26 (26)	0.058	0.291	0.223	0.435
Positive epigenetic regulation of rRNA expression	Reactome	0		108 (109)	1	1	1	439155	4 (6)	0.0591	0.291	0.226	0.435
Lactose synthesis	Reactome	0		3 (3)	1	1	1	79025	4 (4)	0.0591	0.291	0.226	0.435
HDR through MMEJ (alt-NHEJ)	Reactome	0		10 (10)	1	1	1	936	4 (6)	0.0591	0.291	0.226	0.435
Formation of the beta-catenin:TCF transactivating complex	Reactome	0		94 (95)	1	1	1	439155	4 (4)	0.0591	0.291	0.226	0.435
RMTs methylate histone arginines	Reactome	0		74 (74)	1	1	1	439155	4 (4)	0.0591	0.291	0.226	0.435
ER Quality Control Compartment (ERQC)	Reactome	0		19 (19)	1	1	1	18950	4 (13)	0.0591	0.291	0.226	0.435
Antigen processing: Ubiquitination & Proteasome degradation	Reactome	0		265 (265)	1	1	1	6083	4 (5)	0.0591	0.291	0.226	0.435
RUNX1 regulates transcription of genes involved in differentiation of HSCs	Reactome	0		85 (86)	1	1	1	439155	4 (4)	0.0591	0.291	0.226	0.435
Neddylation	Reactome	0		236 (236)	1	1	1	6083	4 (4)	0.0591	0.291	0.226	0.435
Sodium-coupled sulphate_ di- and tri-carboxylate transporters	Reactome	0		5 (5)	1	1	1	1110	4 (4)	0.0591	0.291	0.226	0.435
tRNA modification in the mitochondrion	Reactome	0		6 (6)	1	1	1	439155	4 (8)	0.0591	0.291	0.226	0.435
Senescence-Associated Secretory Phenotype (SASP)	Reactome	0		112 (113)	1	1	1	439155	4 (4)	0.0591	0.291	0.226	0.435
Meiosis	Reactome	0		79 (80)	1	1	1	439155	4 (6)	0.0591	0.291	0.226	0.435
Alanine metabolism	Reactome	0		2 (2)	1	1	1	51	4 (4)	0.0591	0.291	0.226	0.435
Regulation of TP53 Activity through Methylation	Reactome	0		20 (20)	1	1	1	439155	4 (4)	0.0591	0.291	0.226	0.435
Hydroxycarboxylic acid-binding receptors	Reactome	0		3 (3)	1	1	1	938	4 (4)	0.0591	0.291	0.226	0.435
Hydrolysis of LPE	Reactome	0		3 (3)	1	1	1	123874	4 (7)	0.0591	0.291	0.226	0.435
Protein ubiquitination	Reactome	0		80 (80)	1	1	1	6083	4 (4)	0.0591	0.291	0.226	0.435
The activation of arylsulfatases	Reactome	0		13 (13)	1	1	1	439153	4 (4)	0.0591	0.291	0.226	0.435
Mitochondrial Beta-Oxidation of Medium Chain Saturated Fatty Acids	SMPDB	0		8 (8)	1	1	2	6083;439153	25 (25)	0.054	0.29	0.212	0.435
Pyrimidine Metabolism	SMPDB	0		23 (23)	1	1	3	6030;439236;41211	57 (57)	0.0542	0.29	0.212	0.435
Valine_ Leucine and Isoleucine Degradation	SMPDB	0		30 (30)	1	1	3	1110;439153;51	58 (58)	0.0566	0.291	0.219	0.435
NAD metabolism_ sirtuins and aging	Wikipathways	0		11 (11)	1	1	1	439924	4 (4)	0.0591	0.291	0.226	0.435
Fas ligand pathway and stress induction of heat shock proteins	Wikipathways	0		43 (43)	1	1	1	124886	4 (4)	0.0591	0.291	0.226	0.435
Non-genomic actions of 1_25 dihydroxyvitamin D3	Wikipathways	0		68 (68)	1	1	1	444899	4 (4)	0.0591	0.291	0.226	0.435
N-Glycan biosynthesis	EHMN	0		42 (42)	1	1	2	18950;6030	27 (51)	0.062	0.302	0.234	0.444
Protein processing in endoplasmic reticulum - Homo sapiens (human)	KEGG	1	BAG2	170 (171)	0.0617	1	0		1 (6)	1	1	0.234	0.444
ESR-mediated signaling	Reactome	0		216 (217)	1	1	2	9750;439155	27 (30)	0.062	0.302	0.234	0.444
Cobalamin (Cbl_ vitamin B12) transport and metabolism	Reactome	0		18 (18)	1	1	2	439155;439153	27 (29)	0.062	0.302	0.234	0.444
Lysine Degradation	SMPDB	0		13 (13)	1	1	2	439153;51	27 (27)	0.062	0.302	0.234	0.444
Glyoxylate and dicarboxylate metabolism - Homo sapiens (human)	KEGG	0		30 (30)	1	1	3	1110;750;51	61 (62)	0.0639	0.311	0.24	0.453
Phenylalanine and Tyrosine Metabolism	SMPDB	0		11 (11)	1	1	2	6083;51	28 (28)	0.0661	0.32	0.246	0.463
Superpathway of tryptophan utilization	HumanCyc	0		43 (43)	1	1	3	6083;439155;439153	62 (70)	0.0665	0.321	0.247	0.464
Vitamin B12 (cyanocobalamin) metabolism	EHMN	0		0 (0)	1	1	1	439155	10 (10)	0.141	0.474	0.141	0.474
Peroxisomal beta-oxidation of tetracosanoyl-CoA	Wikipathways	0		0 (0)	1	1	1	439153	10 (11)	0.141	0.474	0.141	0.474
Metabolism of anandamide an endogenous cannabinoid	BioCarta	0		7 (7)	1	1	1	444899	5 (6)	0.0733	0.341	0.265	0.481
Glutathione redox reactions II	HumanCyc	0		2 (2)	1	1	1	124886	5 (5)	0.0733	0.341	0.265	0.481
Glycine/serine biosynthesis	HumanCyc	0		2 (2)	1	1	1	750	5 (5)	0.0733	0.341	0.265	0.481
Lactate fermentation (reoxidation of cytosolic NADH)	HumanCyc	0		5 (5)	1	1	1	439153	5 (5)	0.0733	0.341	0.265	0.481
Thiamin salvage III	HumanCyc	0		1 (1)	1	1	1	6083	5 (5)	0.0733	0.341	0.265	0.481
Adenine and adenosine salvage II	HumanCyc	0		1 (1)	1	1	1	6083	5 (5)	0.0733	0.341	0.265	0.481
Sorbitol degradation I	HumanCyc	0		1 (1)	1	1	1	439153	5 (5)	0.0733	0.341	0.265	0.481
Synthesis of bile acids and bile salts via 24-hydroxycholesterol	Reactome	0		14 (14)	1	1	2	6083;439153	29 (29)	0.0704	0.34	0.257	0.481
Hyaluronan metabolism	Reactome	0		12 (12)	1	1	1	444791	5 (7)	0.0733	0.341	0.265	0.481
Maturation of nucleoprotein	Reactome	0		10 (10)	1	1	1	936	5 (5)	0.0733	0.341	0.265	0.481
Hyaluronan uptake and degradation	Reactome	0		10 (10)	1	1	1	444791	5 (7)	0.0733	0.341	0.265	0.481
Gene Silencing by RNA	Reactome	0		139 (140)	1	1	1	439155	5 (8)	0.0733	0.341	0.265	0.481
Regulation of FOXO transcriptional activity by acetylation	Reactome	0		9 (9)	1	1	1	936	5 (6)	0.0733	0.341	0.265	0.481
Intestinal hexose absorption	Reactome	0		3 (3)	1	1	1	79025	5 (5)	0.0733	0.341	0.265	0.481
PDE3B signalling	Reactome	0		2 (2)	1	1	1	6083	5 (6)	0.0733	0.341	0.265	0.481
PKB-mediated events	Reactome	0		2 (2)	1	1	1	6083	5 (6)	0.0733	0.341	0.265	0.481
Acyl chain remodelling of PE	Reactome	0		29 (29)	1	1	1	10747814	5 (13)	0.0733	0.341	0.265	0.481
Methylation of MeSeH for excretion	Reactome	0		1 (1)	1	1	1	439155	5 (6)	0.0733	0.341	0.265	0.481
POLB-Dependent Long Patch Base Excision Repair	Reactome	0		7 (7)	1	1	1	936	5 (7)	0.0733	0.341	0.265	0.481
Resolution of AP sites via the multiple-nucleotide patch replacement pathway	Reactome	0		24 (24)	1	1	1	936	5 (7)	0.0733	0.341	0.265	0.481
Regulation of PTEN stability and activity	Reactome	0		25 (25)	1	1	1	936	5 (5)	0.0733	0.341	0.265	0.481
Maturation of nucleoprotein	Reactome	0		10 (10)	1	1	1	936	5 (5)	0.0733	0.341	0.265	0.481
MicroRNA (miRNA) biogenesis	Reactome	0		12 (12)	1	1	1	439155	5 (6)	0.0733	0.341	0.265	0.481
Oxidative phosphorylation	Wikipathways	0		61 (61)	1	1	1	439153	5 (5)	0.0733	0.341	0.265	0.481
L-kynurenine degradation	HumanCyc	0		13 (13)	1	1	2	439153;51	30 (30)	0.0747	0.345	0.268	0.486
Dopamine metabolism	Wikipathways	0		13 (13)	1	1	2	439155;124886	30 (33)	0.0747	0.345	0.268	0.486
Immune System	Reactome	0		1827 (1828)	1	1	4	6083;9750;124886;10747814	107 (147)	0.0775	0.358	0.276	0.498
Propanoate metabolism	EHMN	0		18 (18)	1	1	2	6083;439153	31 (33)	0.0791	0.363	0.28	0.502
Pentose phosphate cycle	INOH	0		24 (24)	1	1	2	6083;69507	31 (31)	0.0791	0.363	0.28	0.502
Glycerophospholipid metabolism - Homo sapiens (human)	KEGG	0		98 (98)	1	1	2	123874;10747814	31 (55)	0.0791	0.363	0.28	0.502
alpha-linolenic acid (ALA) metabolism	Reactome	0		13 (13)	1	1	2	6083;439153	31 (32)	0.0791	0.363	0.28	0.502
Glucuronidation	Reactome	0		25 (25)	1	1	2	439153;444791	31 (31)	0.0791	0.363	0.28	0.502
Glutathione conjugation	Reactome	0		37 (37)	1	1	2	750;124886	31 (31)	0.0791	0.363	0.28	0.502
Vegf hypoxia and angiogenesis	BioCarta	0		30 (30)	1	1	1	9750	6 (6)	0.0874	0.38	0.3	0.51
Prostaglandin formation from dihomo gama-linoleic acid	EHMN	0		31 (31)	1	1	1	439153	6 (8)	0.0874	0.38	0.3	0.51
Vitamin B9 (folate) metabolism	EHMN	0		26 (26)	1	1	2	439153;750	33 (35)	0.0881	0.382	0.302	0.51
Pyrimidine metabolism	EHMN	0		135 (135)	1	1	3	6083;6030;5960	71 (77)	0.0914	0.39	0.31	0.51
Endohydrolysis of 1_4-alpha-D-glucosidic linkages in polysaccharides by alpha-amylase	EHMN	0		6 (6)	1	1	1	79025	7 (7)	0.101	0.397	0.333	0.51
O-Glycan biosynthesis	EHMN	0		36 (36)	1	1	1	6030	7 (17)	0.101	0.397	0.333	0.51
Acetate conversion to acetyl-CoA	HumanCyc	0		3 (3)	1	1	1	6083	6 (6)	0.0874	0.38	0.3	0.51
Homocarnosine biosynthesis	HumanCyc	0		1 (1)	1	1	1	6274	6 (7)	0.0874	0.38	0.3	0.51
S-adenosyl-L-methionine biosynthesis	HumanCyc	0		3 (3)	1	1	1	6137	6 (6)	0.0874	0.38	0.3	0.51
Retinoate biosynthesis II	HumanCyc	0		5 (5)	1	1	1	439153	6 (6)	0.0874	0.38	0.3	0.51
Retinoate biosynthesis I	HumanCyc	0		9 (9)	1	1	1	439153	6 (6)	0.0874	0.38	0.3	0.51
Lipoate salvage	HumanCyc	0		2 (2)	1	1	1	6083	6 (6)	0.0874	0.38	0.3	0.51
Progesterone biosynthesis	HumanCyc	0		2 (2)	1	1	1	439153	6 (6)	0.0874	0.38	0.3	0.51
PRPP biosynthesis	HumanCyc	0		3 (3)	1	1	1	6083	6 (6)	0.0874	0.38	0.3	0.51
Superpathway of pyrimidine deoxyribonucleotides de novo biosynthesis	HumanCyc	0		22 (22)	1	1	2	6030;5960	34 (34)	0.0927	0.39	0.313	0.51
Flavin biosynthesis	HumanCyc	0		2 (2)	1	1	1	493570	7 (7)	0.101	0.397	0.333	0.51
Pyruvate decarboxylation to acetyl CoA	HumanCyc	0		5 (5)	1	1	1	439153	7 (7)	0.101	0.397	0.333	0.51
Glycogenolysis	HumanCyc	0		9 (9)	1	1	1	79025	7 (7)	0.101	0.397	0.333	0.51
Carnosine biosynthesis	HumanCyc	0		1 (1)	1	1	1	6274	7 (7)	0.101	0.397	0.333	0.51
Lipoxin biosynthesis	HumanCyc	0		3 (3)	1	1	1	444899	7 (7)	0.101	0.397	0.333	0.51
Guanine and guanosine salvage	HumanCyc	0		2 (2)	1	1	1	439236	7 (7)	0.101	0.397	0.333	0.51
Bupropion degradation	HumanCyc	0		5 (5)	1	1	1	750	7 (10)	0.101	0.397	0.333	0.51
NAD phosphorylation and dephosphorylation	HumanCyc	0		2 (2)	1	1	1	439153	7 (7)	0.101	0.397	0.333	0.51
mRNA capping	HumanCyc	0		4 (4)	1	1	1	439155	7 (7)	0.101	0.397	0.333	0.51
NAD salvage	HumanCyc	0		4 (4)	1	1	1	936	7 (7)	0.101	0.397	0.333	0.51
2-oxoisovalerate decarboxylation to isobutanoyl-CoA	HumanCyc	0		4 (4)	1	1	1	439153	7 (7)	0.101	0.397	0.333	0.51
Putrescine biosynthesis II	HumanCyc	0		2 (2)	1	1	1	1176	7 (7)	0.101	0.397	0.333	0.51
GnRH signaling pathway - Homo sapiens (human)	KEGG	0		93 (93)	1	1	1	444899	6 (6)	0.0874	0.38	0.3	0.51
Fc gamma R-mediated phagocytosis - Homo sapiens (human)	KEGG	0		96 (97)	1	1	1	444899	6 (8)	0.0874	0.38	0.3	0.51
Longevity regulating pathway - Homo sapiens (human)	KEGG	0		89 (89)	1	1	1	6083	7 (8)	0.101	0.397	0.333	0.51
SHP2 signaling	PID	0		59 (59)	1	1	1	9750	6 (6)	0.0874	0.38	0.3	0.51
VEGFR1 specific signals	PID	0		29 (29)	1	1	1	9750	6 (6)	0.0874	0.38	0.3	0.51
Fc-epsilon receptor I signaling in mast cells	PID	0		62 (62)	1	1	1	10747814	7 (8)	0.101	0.397	0.333	0.51
Lysine catabolism	Reactome	0		12 (12)	1	1	2	439153;51	32 (32)	0.0835	0.38	0.291	0.51
RAF/MAP kinase cascade	Reactome	0		235 (235)	1	1	2	439155;750	32 (36)	0.0835	0.38	0.291	0.51
MAPK1/MAPK3 signaling	Reactome	0		236 (236)	1	1	2	439155;750	32 (36)	0.0835	0.38	0.291	0.51
MAPK family signaling cascades	Reactome	0		270 (270)	1	1	2	439155;750	32 (36)	0.0835	0.38	0.291	0.51
Biosynthesis of DHA-derived SPMs	Reactome	0		17 (17)	1	1	3	750;439153;124886	69 (75)	0.0856	0.38	0.296	0.51
Long-term potentiation	Reactome	0		23 (23)	1	1	1	750	6 (6)	0.0874	0.38	0.3	0.51
5-Phosphoribose 1-diphosphate biosynthesis	Reactome	0		3 (3)	1	1	1	6083	6 (6)	0.0874	0.38	0.3	0.51
Eukaryotic Translation Termination	Reactome	0		103 (103)	1	1	1	439155	6 (11)	0.0874	0.38	0.3	0.51
Synthesis of PS	Reactome	0		2 (2)	1	1	1	10747814	6 (6)	0.0874	0.38	0.3	0.51
Reuptake of GABA	Reactome	0		4 (4)	1	1	1	247	6 (6)	0.0874	0.38	0.3	0.51
Transcriptional regulation by RUNX1	Reactome	0		195 (196)	1	1	1	439155	6 (7)	0.0874	0.38	0.3	0.51
Interferon Signaling	Reactome	0		162 (162)	1	1	1	6083	6 (12)	0.0874	0.38	0.3	0.51
Acyl chain remodelling of PC	Reactome	0		27 (27)	1	1	1	10747814	6 (13)	0.0874	0.38	0.3	0.51
Acyl chain remodeling of CL	Reactome	0		6 (6)	1	1	1	10747814	6 (12)	0.0874	0.38	0.3	0.51
PI3K Cascade	Reactome	0		44 (44)	1	1	1	6083	6 (10)	0.0874	0.38	0.3	0.51
mRNA Capping	Reactome	0		29 (29)	1	1	1	439155	6 (9)	0.0874	0.38	0.3	0.51
Resolution of Abasic Sites (AP sites)	Reactome	0		37 (37)	1	1	1	936	6 (9)	0.0874	0.38	0.3	0.51
Regulation of glycolysis by fructose 2_6-bisphosphate metabolism	Reactome	0		12 (12)	1	1	1	69507	6 (6)	0.0874	0.38	0.3	0.51
Synthesis of GDP-mannose	Reactome	0		5 (5)	1	1	1	69507	6 (6)	0.0874	0.38	0.3	0.51
Arachidonate production from DAG	Reactome	0		5 (5)	1	1	1	444899	6 (8)	0.0874	0.38	0.3	0.51
Ras activation upon Ca2+ influx through NMDA receptor	Reactome	0		22 (22)	1	1	1	750	6 (6)	0.0874	0.38	0.3	0.51
Neurotransmitter clearance	Reactome	0		10 (10)	1	1	2	439155;439153	33 (33)	0.0881	0.382	0.302	0.51
Glycosphingolipid metabolism	Reactome	0		46 (46)	1	1	2	79025;439153	33 (38)	0.0881	0.382	0.302	0.51
Glycosaminoglycan metabolism	Reactome	0		119 (119)	1	1	2	6030;444791	34 (60)	0.0927	0.39	0.313	0.51
Synthesis of bile acids and bile salts	Reactome	0		30 (30)	1	1	3	6083;439153;750	74 (75)	0.1	0.397	0.331	0.51
Energy dependent regulation of mTOR by LKB1-AMPK	Reactome	0		29 (29)	1	1	1	6083	7 (7)	0.101	0.397	0.333	0.51
Recruitment and ATM-mediated phosphorylation of repair and signaling proteins at DNA double strand breaks	Reactome	0		77 (78)	1	1	1	439155	7 (8)	0.101	0.397	0.333	0.51
Transcriptional activation of mitochondrial biogenesis	Reactome	0		27 (27)	1	1	1	936	7 (7)	0.101	0.397	0.333	0.51
Global Genome Nucleotide Excision Repair (GG-NER)	Reactome	0		70 (70)	1	1	1	936	7 (10)	0.101	0.397	0.333	0.51
ABC transporters in lipid homeostasis	Reactome	0		18 (18)	1	1	1	10747814	7 (11)	0.101	0.397	0.333	0.51
Signaling by TGF-beta Receptor Complex	Reactome	0		68 (68)	1	1	1	936	7 (7)	0.101	0.397	0.333	0.51
Signaling by TGFB family members	Reactome	0		96 (96)	1	1	1	936	7 (8)	0.101	0.397	0.333	0.51
Macroautophagy	Reactome	0		106 (106)	1	1	1	6083	7 (12)	0.101	0.397	0.333	0.51
Nucleotide Excision Repair	Reactome	0		97 (97)	1	1	1	936	7 (10)	0.101	0.397	0.333	0.51
tRNA processing in the nucleus	Reactome	0		58 (58)	1	1	1	6083	7 (10)	0.101	0.397	0.333	0.51
COX reactions	Reactome	0		1 (1)	1	1	1	444899	7 (8)	0.101	0.397	0.333	0.51
Cyclin A/B1/B2 associated events during G2/M transition	Reactome	0		24 (24)	1	1	1	439155	7 (8)	0.101	0.397	0.333	0.51
L1CAM interactions	Reactome	0		102 (102)	1	1	1	985	7 (10)	0.101	0.397	0.333	0.51
Translocation of SLC2A4 (GLUT4) to the plasma membrane	Reactome	0		34 (34)	1	1	1	6083	7 (8)	0.101	0.397	0.333	0.51
Intestinal absorption	Reactome	0		4 (4)	1	1	1	79025	7 (8)	0.101	0.397	0.333	0.51
COPI-independent Golgi-to-ER retrograde traffic	Reactome	0		34 (34)	1	1	1	10747814	7 (9)	0.101	0.397	0.333	0.51
Initiation of Nuclear Envelope (NE) Reformation	Reactome	0		19 (19)	1	1	1	936	7 (9)	0.101	0.397	0.333	0.51
LTC4-CYSLTR mediated IL4 production	Reactome	0		7 (7)	1	1	1	750	7 (7)	0.101	0.397	0.333	0.51
Synthesis of dolichyl-phosphate-glucose	Reactome	0		2 (2)	1	1	1	6030	7 (7)	0.101	0.397	0.333	0.51
NADPH regeneration	Reactome	0		1 (1)	1	1	1	51	7 (8)	0.101	0.397	0.333	0.51
Autophagy	Reactome	0		113 (113)	1	1	1	6083	7 (13)	0.101	0.397	0.333	0.51
Interconversion of 2-oxoglutarate and 2-hydroxyglutarate	Reactome	0		3 (3)	1	1	1	51	7 (7)	0.101	0.397	0.333	0.51
Retinol Metabolism	SMPDB	0		37 (37)	1	1	2	439153;10747814	32 (32)	0.0835	0.38	0.291	0.51
Fatty Acid Biosynthesis	SMPDB	0		2 (2)	1	1	2	985;867	33 (33)	0.0881	0.382	0.302	0.51
Arachidonic Acid Metabolism	SMPDB	0		30 (30)	1	1	3	124886;444899;10747814	71 (71)	0.0914	0.39	0.31	0.51
Fatty Acid Elongation In Mitochondria	SMPDB	0		7 (7)	1	1	2	985;439153	34 (34)	0.0927	0.39	0.313	0.51
Purinergic signaling	Wikipathways	0		33 (33)	1	1	2	6083;124886	34 (55)	0.0927	0.39	0.313	0.51
PDGF Pathway	Wikipathways	0		11 (11)	1	1	1	444899	7 (8)	0.101	0.397	0.333	0.51
PI3K-AKT-mTOR - VitD3 signaling	Wikipathways	0		22 (22)	1	1	1	41211	7 (8)	0.101	0.397	0.333	0.51
AMP-activated protein kinase (AMPK) signaling	Wikipathways	0		68 (68)	1	1	1	41211	7 (7)	0.101	0.397	0.333	0.51
Effects of nitric oxide	Wikipathways	0		8 (8)	1	1	1	9750	7 (7)	0.101	0.397	0.333	0.51
Corticosteroids and cardioprotection	BioCarta	0		27 (27)	1	1	1	9750	8 (8)	0.115	0.425	0.363	0.525
Phosphatidylcholine biosynthesis pathway	BioCarta	0		3 (3)	1	1	1	10747814	8 (8)	0.115	0.425	0.363	0.525
Eicosanoid metabolism	BioCarta	0		23 (23)	1	1	1	444899	8 (9)	0.115	0.425	0.363	0.525
Putative anti-Inflammatory metabolites formation from EPA	EHMN	0		41 (41)	1	1	1	124886	8 (10)	0.115	0.425	0.363	0.525
Pyrimidine ribonucleosides degradation	HumanCyc	0		3 (3)	1	1	1	439236	8 (8)	0.115	0.425	0.363	0.525
L-cysteine degradation II	HumanCyc	0		2 (2)	1	1	1	51	8 (8)	0.115	0.425	0.363	0.525
NADH repair	HumanCyc	0		3 (3)	1	1	1	439153	8 (8)	0.115	0.425	0.363	0.525
alpha;-tocopherol degradation	HumanCyc	0		1 (1)	1	1	1	14985	8 (10)	0.115	0.425	0.363	0.525
Trehalose degradation	HumanCyc	0		4 (4)	1	1	1	79025	8 (8)	0.115	0.425	0.363	0.525
Allopregnanolone biosynthesis	HumanCyc	0		6 (6)	1	1	1	439153	8 (8)	0.115	0.425	0.363	0.525
Methylglyoxal degradation III	HumanCyc	0		3 (3)	1	1	1	439153	8 (8)	0.115	0.425	0.363	0.525
UDP-D-xylose and UDP-D-glucuronate biosynthesis	HumanCyc	0		2 (2)	1	1	1	439153	8 (8)	0.115	0.425	0.363	0.525
2-deoxy-&alpha;-D-ribose 1-phosphate degradation	HumanCyc	0		6 (6)	1	1	1	439153	8 (8)	0.115	0.425	0.363	0.525
C20 prostanoid biosynthesis	HumanCyc	0		9 (9)	1	1	1	444899	8 (8)	0.115	0.425	0.363	0.525
Signaling events mediated by VEGFR1 and VEGFR2	PID	0		68 (68)	1	1	1	9750	8 (8)	0.115	0.425	0.363	0.525
Methylation	Reactome	0		14 (14)	1	1	2	439155;124886	37 (38)	0.107	0.418	0.346	0.525
Digestion	Reactome	0		22 (22)	1	1	2	985;79025	37 (42)	0.107	0.418	0.346	0.525
Branched-chain amino acid catabolism	Reactome	0		21 (21)	1	1	2	439153;51	38 (39)	0.112	0.425	0.357	0.525
Degradation of cysteine and homocysteine	Reactome	0		13 (13)	1	1	2	439153;51	38 (40)	0.112	0.425	0.357	0.525
Pyrimidine catabolism	Reactome	0		12 (12)	1	1	2	6030;439236	38 (39)	0.112	0.425	0.357	0.525
Bile acid and bile salt metabolism	Reactome	0		43 (43)	1	1	3	6083;439153;750	78 (79)	0.113	0.425	0.36	0.525
Passive transport by Aquaporins	Reactome	0		13 (13)	1	1	1	1176	8 (8)	0.115	0.425	0.363	0.525
Processing of DNA double-strand break ends	Reactome	0		98 (99)	1	1	1	936	8 (10)	0.115	0.425	0.363	0.525
IRS-related events triggered by IGF1R	Reactome	0		52 (52)	1	1	1	6083	8 (12)	0.115	0.425	0.363	0.525
IGF1R signaling cascade	Reactome	0		53 (53)	1	1	1	6083	8 (12)	0.115	0.425	0.363	0.525
Lysosomal oligosaccharide catabolism	Reactome	0		4 (4)	1	1	1	18950	8 (8)	0.115	0.425	0.363	0.525
Mismatch repair (MMR) directed by MSH2:MSH6 (MutSalpha)	Reactome	0		14 (14)	1	1	1	6083	8 (9)	0.115	0.425	0.363	0.525
Mismatch repair (MMR) directed by MSH2:MSH3 (MutSbeta)	Reactome	0		14 (14)	1	1	1	6083	8 (9)	0.115	0.425	0.363	0.525
Mismatch Repair	Reactome	0		15 (15)	1	1	1	6083	8 (9)	0.115	0.425	0.363	0.525
CaM pathway	Reactome	0		37 (37)	1	1	1	6083	8 (8)	0.115	0.425	0.363	0.525
Organic anion transport	Reactome	0		5 (5)	1	1	1	51	8 (8)	0.115	0.425	0.363	0.525
Conjugation of phenylacetate with glutamine	Reactome	0		2 (2)	1	1	1	6083	8 (9)	0.115	0.425	0.363	0.525
G2/M Transition	Reactome	0		138 (138)	1	1	1	439155	8 (9)	0.115	0.425	0.363	0.525
Mitotic G2-G2/M phases	Reactome	0		140 (140)	1	1	1	439155	8 (9)	0.115	0.425	0.363	0.525
EPHB-mediated forward signaling	Reactome	0		35 (35)	1	1	1	750	8 (10)	0.115	0.425	0.363	0.525
EPH-Ephrin signaling	Reactome	0		74 (74)	1	1	1	750	8 (10)	0.115	0.425	0.363	0.525
IRS-mediated signalling	Reactome	0		48 (48)	1	1	1	6083	8 (12)	0.115	0.425	0.363	0.525
Calmodulin induced events	Reactome	0		37 (37)	1	1	1	6083	8 (8)	0.115	0.425	0.363	0.525
Signaling by Type 1 Insulin-like Growth Factor 1 Receptor (IGF1R)	Reactome	0		53 (53)	1	1	1	6083	8 (12)	0.115	0.425	0.363	0.525
MTOR signalling	Reactome	0		41 (41)	1	1	1	6083	8 (9)	0.115	0.425	0.363	0.525
CREB1 phosphorylation through NMDA receptor-mediated activation of RAS signaling	Reactome	0		30 (30)	1	1	1	750	8 (10)	0.115	0.425	0.363	0.525
Kidney Function	SMPDB	0		33 (33)	1	1	1	1176	8 (8)	0.115	0.425	0.363	0.525
Oxidation by Cytochrome P450	Wikipathways	0		62 (62)	1	1	1	439153	8 (8)	0.115	0.425	0.363	0.525
Digestion and absorption	Reactome	0		26 (26)	1	1	2	985;79025	39 (45)	0.117	0.429	0.368	0.528
Porphyrin Metabolism	SMPDB	0		15 (15)	1	1	2	439153;750	39 (39)	0.117	0.429	0.368	0.528
Proteoglycan biosynthesis	EHMN	0		30 (30)	1	1	1	6030	9 (19)	0.128	0.447	0.392	0.532
Glycerol-3-phosphate shuttle	HumanCyc	0		2 (2)	1	1	1	439153	9 (9)	0.128	0.447	0.392	0.532
Pyrimidine ribonucleosides salvage I	HumanCyc	0		4 (4)	1	1	1	6030	9 (9)	0.128	0.447	0.392	0.532
Gamma;-linolenate biosynthesis	HumanCyc	0		14 (14)	1	1	1	6083	9 (9)	0.128	0.447	0.392	0.532
L-glutamine tRNA biosynthesis	HumanCyc	0		2 (2)	1	1	1	6083	9 (9)	0.128	0.447	0.392	0.532
Fatty acid degradation - Homo sapiens (human)	KEGG	0		43 (43)	1	1	2	985;743	40 (50)	0.122	0.447	0.378	0.532
Butanoate metabolism - Homo sapiens (human)	KEGG	0		28 (28)	1	1	2	1110;51	41 (42)	0.127	0.447	0.389	0.532
C-type lectin receptor signaling pathway - Homo sapiens (human)	KEGG	0		104 (104)	1	1	1	18950	9 (12)	0.128	0.447	0.392	0.532
Ether lipid metabolism - Homo sapiens (human)	KEGG	0		49 (49)	1	1	1	123874	9 (25)	0.128	0.447	0.392	0.532
Plasma membrane estrogen receptor signaling	PID	0		42 (42)	1	1	1	9750	9 (9)	0.128	0.447	0.392	0.532
alpha-linolenic (omega3) and linoleic (omega6) acid metabolism	Reactome	0		13 (13)	1	1	2	6083;439153	41 (42)	0.127	0.447	0.389	0.532
Metabolism of porphyrins	Reactome	0		29 (29)	1	1	2	750;444791	41 (43)	0.127	0.447	0.389	0.532
Miscellaneous transport and binding events	Reactome	0		24 (24)	1	1	1	6274	9 (11)	0.128	0.447	0.392	0.532
HS-GAG biosynthesis	Reactome	0		31 (31)	1	1	1	6030	9 (9)	0.128	0.447	0.392	0.532
Homology Directed Repair	Reactome	0		139 (140)	1	1	1	936	9 (13)	0.128	0.447	0.392	0.532
HDR through Homologous Recombination (HRR) or Single Strand Annealing (SSA)	Reactome	0		133 (134)	1	1	1	936	9 (13)	0.128	0.447	0.392	0.532
Reproduction	Reactome	0		105 (106)	1	1	1	439155	9 (11)	0.128	0.447	0.392	0.532
Synthesis of Hepoxilins (HX) and Trioxilins (TrX)	Reactome	0		1 (1)	1	1	1	444899	9 (10)	0.128	0.447	0.392	0.532
Carboxyterminal post-translational modifications of tubulin	Reactome	0		42 (42)	1	1	1	750	9 (10)	0.128	0.447	0.392	0.532
DNA Double Strand Break Response	Reactome	0		78 (79)	1	1	1	439155	9 (10)	0.128	0.447	0.392	0.532
Vitamin B1 (thiamin) metabolism	Reactome	0		5 (5)	1	1	1	6083	9 (10)	0.128	0.447	0.392	0.532
Hypusine synthesis from eIF5A-lysine	Reactome	0		4 (4)	1	1	1	439153	9 (9)	0.128	0.447	0.392	0.532
Fatty Acids bound to GPR40 (FFAR1) regulate insulin secretion	Reactome	0		8 (8)	1	1	1	985	9 (12)	0.128	0.447	0.392	0.532
Golgi-to-ER retrograde transport	Reactome	0		116 (116)	1	1	1	10747814	9 (11)	0.128	0.447	0.392	0.532
Insulin receptor signalling cascade	Reactome	0		54 (54)	1	1	1	6083	9 (14)	0.128	0.447	0.392	0.532
Biotin transport and metabolism	Reactome	0		11 (11)	1	1	1	6083	9 (9)	0.128	0.447	0.392	0.532
Keratan sulfate biosynthesis	Reactome	0		28 (28)	1	1	1	6030	9 (9)	0.128	0.447	0.392	0.532
Phenylacetate Metabolism	SMPDB	0		3 (3)	1	1	1	6083	9 (9)	0.128	0.447	0.392	0.532
Thiamine Metabolism	SMPDB	0		4 (4)	1	1	1	6083	9 (9)	0.128	0.447	0.392	0.532
Lipid Metabolism Pathway	Wikipathways	0		29 (29)	1	1	1	985	9 (14)	0.128	0.447	0.392	0.532
Association Between Physico-Chemical Features and Toxicity Associated Pathways	Wikipathways	0		65 (65)	1	1	1	611	9 (9)	0.128	0.447	0.392	0.532
Pentose Phosphate Metabolism	Wikipathways	0		7 (7)	1	1	1	69507	9 (9)	0.128	0.447	0.392	0.532
ROS and RNS production in phagocytes	Reactome	0		35 (35)	1	1	2	9750;124886	42 (50)	0.132	0.459	0.399	0.542
Mitochondrial fatty acid beta-oxidation of saturated fatty acids	Reactome	0		11 (11)	1	1	2	6083;439153	42 (42)	0.132	0.459	0.399	0.542
chrebp regulation by carbohydrates and camp	BioCarta	0		42 (42)	1	1	1	6083	10 (12)	0.141	0.474	0.418	0.547
Dimethyl-branched-chain fatty acid mitochondrial beta-oxidation	EHMN	0		12 (12)	1	1	1	439153	10 (10)	0.141	0.474	0.418	0.547
3-oxo-10R-octadecatrienoate beta-oxidation	EHMN	0		11 (11)	1	1	1	439153	10 (10)	0.141	0.474	0.418	0.547
Trihydroxycoprostanoyl-CoA beta-oxidation	EHMN	0		12 (12)	1	1	1	439153	10 (10)	0.141	0.474	0.418	0.547
phenylethylamine degradation I	HumanCyc	0		4 (4)	1	1	1	439153	10 (10)	0.141	0.474	0.418	0.547
L-cysteine degradation I	HumanCyc	0		2 (2)	1	1	1	51	10 (10)	0.141	0.474	0.418	0.547
Palmitate biosynthesis	HumanCyc	0		8 (9)	1	1	1	985	10 (10)	0.141	0.474	0.418	0.547
Purine deoxyribonucleosides degradation	HumanCyc	0		2 (2)	1	1	1	790	10 (10)	0.141	0.474	0.418	0.547
Selenocysteine biosynthesis	HumanCyc	0		6 (6)	1	1	1	6083	10 (10)	0.141	0.474	0.418	0.547
D-Arginine and D-ornithine metabolism - Homo sapiens (human)	KEGG	0		1 (1)	1	1	1	6262	10 (11)	0.141	0.474	0.418	0.547
Calcium signaling pathway - Homo sapiens (human)	KEGG	0		239 (240)	1	1	1	439153	10 (11)	0.141	0.474	0.418	0.547
cGMP-PKG signaling pathway - Homo sapiens (human)	KEGG	0		167 (167)	1	1	1	6083	10 (10)	0.141	0.474	0.418	0.547
Parathyroid hormone synthesis_ secretion and action - Homo sapiens (human)	KEGG	0		106 (106)	1	1	1	6083	10 (10)	0.141	0.474	0.418	0.547
Fc epsilon RI signaling pathway - Homo sapiens (human)	KEGG	0		67 (68)	1	1	1	444899	10 (11)	0.141	0.474	0.418	0.547
Angiopoietin receptor Tie2-mediated signaling	PID	0		50 (50)	1	1	1	9750	10 (11)	0.141	0.474	0.418	0.547
Signaling by Receptor Tyrosine Kinases	Reactome	0		464 (464)	1	1	2	6083;9750	43 (53)	0.137	0.474	0.409	0.547
Phase I - Functionalization of compounds	Reactome	0		101 (101)	1	1	5	6083;439924;439153;301590;444899	182 (191)	0.139	0.474	0.414	0.547
HS-GAG degradation	Reactome	0		21 (21)	1	1	1	444791	10 (22)	0.141	0.474	0.418	0.547
SUMOylation	Reactome	0		182 (182)	1	1	1	6083	10 (11)	0.141	0.474	0.418	0.547
Enzymatic degradation of dopamine by COMT	Reactome	0		3 (3)	1	1	1	439155	10 (10)	0.141	0.474	0.418	0.547
Reactions specific to the complex N-glycan synthesis pathway	Reactome	0		10 (10)	1	1	1	18950	10 (19)	0.141	0.474	0.418	0.547
Glycogen synthesis	Reactome	0		11 (11)	1	1	1	6030	10 (10)	0.141	0.474	0.418	0.547
Formation of the active cofactor_ UDP-glucuronate	Reactome	0		3 (3)	1	1	1	439153	10 (10)	0.141	0.474	0.418	0.547
Multifunctional anion exchangers	Reactome	0		9 (9)	1	1	1	938	10 (10)	0.141	0.474	0.418	0.547
Factors involved in megakaryocyte development and platelet production	Reactome	0		145 (145)	1	1	1	6083	10 (13)	0.141	0.474	0.418	0.547
Role of phospholipids in phagocytosis	Reactome	0		105 (105)	1	1	1	10747814	10 (13)	0.141	0.474	0.418	0.547
Signaling by Insulin receptor	Reactome	0		78 (78)	1	1	1	6083	10 (15)	0.141	0.474	0.418	0.547
Nuclear Envelope (NE) Reassembly	Reactome	0		78 (78)	1	1	1	936	10 (12)	0.141	0.474	0.418	0.547
Synthesis of PG	Reactome	0		9 (9)	1	1	1	10747814	10 (13)	0.141	0.474	0.418	0.547
DAG and IP3 signaling	Reactome	0		42 (42)	1	1	1	6083	10 (11)	0.141	0.474	0.418	0.547
Regulation of pyruvate dehydrogenase (PDH) complex	Reactome	0		14 (14)	1	1	1	124886	10 (10)	0.141	0.474	0.418	0.547
Trehalose Degradation	SMPDB	0		12 (12)	1	1	1	79025	10 (10)	0.141	0.474	0.418	0.547
Glycerol Phosphate Shuttle	SMPDB	0		3 (3)	1	1	1	439153	10 (10)	0.141	0.474	0.418	0.547
Acetylcholine Synthesis	Wikipathways	0		7 (7)	1	1	1	10747814	10 (11)	0.141	0.474	0.418	0.547
Sulfation Biotransformation Reaction	Wikipathways	0		17 (17)	1	1	1	124886	10 (10)	0.141	0.474	0.418	0.547
Biosynthesis of specialized proresolving mediators (SPMs)	Reactome	0		19 (19)	1	1	4	124886;439153;750;446284	134 (143)	0.143	0.481	0.422	0.552
Ion channels and their functional role in vascular endothelium	BioCarta	0		47 (47)	1	1	1	9750	11 (11)	0.154	0.501	0.443	0.56
Vitamin B1 (thiamin) metabolism	EHMN	0		3 (3)	1	1	1	6083	11 (11)	0.154	0.501	0.443	0.56
Superoxide radicals degradation	HumanCyc	0		11 (11)	1	1	1	124886	11 (11)	0.154	0.501	0.443	0.56
dTMP de novo biosynthesis (mitochondrial)	HumanCyc	0		5 (5)	1	1	1	750	11 (11)	0.154	0.501	0.443	0.56
UTP and CTP de novo biosynthesis	HumanCyc	0		13 (13)	1	1	1	6030	11 (11)	0.154	0.501	0.443	0.56
Biotin-carboxyl carrier protein assembly	HumanCyc	0		3 (3)	1	1	1	6083	11 (11)	0.154	0.501	0.443	0.56
Epoxysqualene biosynthesis	HumanCyc	0		2 (2)	1	1	1	439153	11 (11)	0.154	0.501	0.443	0.56
Phenylalanine degradation/tyrosine biosynthesis	HumanCyc	0		4 (4)	1	1	1	439153	11 (11)	0.154	0.501	0.443	0.56
UTP and CTP dephosphorylation II	HumanCyc	0		4 (4)	1	1	1	6030	11 (11)	0.154	0.501	0.443	0.56
GDP-glucose biosynthesis II	HumanCyc	0		6 (6)	1	1	1	79025	11 (11)	0.154	0.501	0.443	0.56
Tetrapyrrole biosynthesis	HumanCyc	0		5 (5)	1	1	1	750	11 (11)	0.154	0.501	0.443	0.56
Taurine biosynthesis	HumanCyc	0		3 (3)	1	1	1	439153	11 (11)	0.154	0.501	0.443	0.56
Methylglyoxal degradation I	HumanCyc	0		3 (3)	1	1	1	124886	11 (11)	0.154	0.501	0.443	0.56
Synaptic vesicle cycle - Homo sapiens (human)	KEGG	0		78 (78)	1	1	1	750	11 (12)	0.154	0.501	0.443	0.56
D-Glutamine and D-glutamate metabolism - Homo sapiens (human)	KEGG	0		5 (5)	1	1	1	51	11 (13)	0.154	0.501	0.443	0.56
Alpha9 beta1 integrin signaling events	PID	0		25 (25)	1	1	1	9750	11 (11)	0.154	0.501	0.443	0.56
Innate Immune System	Reactome	0		1064 (1065)	1	1	3	9750;124886;10747814	88 (119)	0.147	0.492	0.429	0.56
Metabolism of cofactors	Reactome	0		21 (21)	1	1	2	439155;51	45 (48)	0.147	0.493	0.43	0.56
Erythrocytes take up carbon dioxide and release oxygen	Reactome	0		13 (13)	1	1	1	439153	11 (11)	0.154	0.501	0.443	0.56
Metabolism of serotonin	Reactome	0		2 (2)	1	1	1	439153	11 (11)	0.154	0.501	0.443	0.56
Plasma lipoprotein remodeling	Reactome	0		26 (26)	1	1	1	10747814	11 (16)	0.154	0.501	0.443	0.56
PTEN Regulation	Reactome	0		93 (93)	1	1	1	936	11 (11)	0.154	0.501	0.443	0.56
Synthesis of (16-20)-hydroxyeicosatetraenoic acids (HETE)	Reactome	0		9 (9)	1	1	1	444899	11 (11)	0.154	0.501	0.443	0.56
Intra-Golgi and retrograde Golgi-to-ER traffic	Reactome	0		186 (186)	1	1	1	10747814	11 (13)	0.154	0.501	0.443	0.56
Translation of structural proteins	Reactome	0		23 (23)	1	1	1	936	11 (11)	0.154	0.501	0.443	0.56
FOXO-mediated transcription	Reactome	0		62 (62)	1	1	1	936	11 (12)	0.154	0.501	0.443	0.56
Mitochondrial fatty acid beta-oxidation of unsaturated fatty acids	Reactome	0		3 (3)	1	1	1	439153	11 (11)	0.154	0.501	0.443	0.56
Effects of PIP2 hydrolysis	Reactome	0		27 (27)	1	1	1	444899	11 (13)	0.154	0.501	0.443	0.56
Translation of structural proteins	Reactome	0		23 (23)	1	1	1	936	11 (11)	0.154	0.501	0.443	0.56
O2/CO2 exchange in erythrocytes	Reactome	0		13 (13)	1	1	1	439153	11 (11)	0.154	0.501	0.443	0.56
Nitric oxide stimulates guanylate cyclase	Reactome	0		23 (23)	1	1	1	9750	11 (11)	0.154	0.501	0.443	0.56
HDL remodeling	Reactome	0		9 (9)	1	1	1	10747814	11 (13)	0.154	0.501	0.443	0.56
D-Arginine and D-Ornithine Metabolism	SMPDB	0		1 (1)	1	1	1	1176	11 (11)	0.154	0.501	0.443	0.56
Differentiation Pathway	Wikipathways	0		48 (48)	1	1	1	936	11 (12)	0.154	0.501	0.443	0.56
Arachidonate Epoxygenase - Epoxide Hydrolase	Wikipathways	0		7 (7)	1	1	1	444899	11 (11)	0.154	0.501	0.443	0.56
Prostaglandin Synthesis and Regulation	Wikipathways	0		44 (44)	1	1	1	444899	11 (12)	0.154	0.501	0.443	0.56
Lipoate metabolism	EHMN	0		7 (7)	1	1	1	439153	12 (12)	0.167	0.53	0.466	0.575
Vitamin D3 (cholecalciferol) metabolism	EHMN	0		27 (27)	1	1	1	439153	12 (12)	0.167	0.53	0.466	0.575
Phosphatidylcholine biosynthesis	HumanCyc	0		7 (7)	1	1	1	10747814	12 (12)	0.167	0.53	0.466	0.575
D-glucuronate degradation	HumanCyc	0		2 (2)	1	1	1	439153	12 (12)	0.167	0.53	0.466	0.575
2-amino-3-carboxymuconate semialdehyde degradation to glutaryl-CoA	HumanCyc	0		2 (2)	1	1	1	439153	12 (12)	0.167	0.53	0.466	0.575
Ketogenesis	HumanCyc	0		8 (8)	1	1	1	439153	12 (12)	0.167	0.53	0.466	0.575
Sucrose degradation	HumanCyc	0		8 (8)	1	1	1	79025	12 (12)	0.167	0.53	0.466	0.575
Histidine degradation	HumanCyc	0		6 (6)	1	1	1	6274	12 (12)	0.167	0.53	0.466	0.575
Glutaryl-CoA degradation	HumanCyc	0		4 (4)	1	1	1	439153	12 (12)	0.167	0.53	0.466	0.575
Heme degradation	HumanCyc	0		4 (4)	1	1	1	439153	12 (12)	0.167	0.53	0.466	0.575
Mitochondrial L-carnitine shuttle	HumanCyc	0		6 (6)	1	1	1	10917	12 (12)	0.167	0.53	0.466	0.575
Neuroactive ligand-receptor interaction - Homo sapiens (human)	KEGG	0		341 (341)	1	1	2	5960;750	48 (52)	0.163	0.53	0.459	0.575
Cortisol synthesis and secretion - Homo sapiens (human)	KEGG	0		65 (65)	1	1	1	6083	12 (12)	0.167	0.53	0.466	0.575
Oxytocin signaling pathway - Homo sapiens (human)	KEGG	0		154 (154)	1	1	1	444899	12 (12)	0.167	0.53	0.466	0.575
Visual signal transduction: Rods	PID	0		24 (24)	1	1	1	10747814	12 (13)	0.167	0.53	0.466	0.575
Thromboxane A2 receptor signaling	PID	0		56 (56)	1	1	1	9750	12 (12)	0.167	0.53	0.466	0.575
RHO GTPases Activate NADPH Oxidases	Reactome	0		24 (24)	1	1	1	444899	12 (14)	0.167	0.53	0.466	0.575
Fcgamma receptor (FCGR) dependent phagocytosis	Reactome	0		155 (155)	1	1	1	10747814	12 (16)	0.167	0.53	0.466	0.575
Surfactant metabolism	Reactome	0		26 (26)	1	1	1	10747814	12 (13)	0.167	0.53	0.466	0.575
Mitotic Anaphase	Reactome	0		195 (195)	1	1	1	936	12 (14)	0.167	0.53	0.466	0.575
Mitotic Metaphase and Anaphase	Reactome	0		196 (196)	1	1	1	936	12 (14)	0.167	0.53	0.466	0.575
Plasmalogen biosynthesis	Reactome	0		3 (3)	1	1	1	985	12 (12)	0.167	0.53	0.466	0.575
Phosphodiesterases in neuronal function	Wikipathways	0		52 (52)	1	1	1	41211	12 (12)	0.167	0.53	0.466	0.575
Vitamin C metabolism	EHMN	0		3 (3)	1	1	1	14985	13 (13)	0.18	0.559	0.488	0.591
Coenzyme A biosynthesis	HumanCyc	0		7 (7)	1	1	1	6083	13 (13)	0.18	0.559	0.488	0.591
Tyrosine degradation	HumanCyc	0		5 (5)	1	1	1	51	13 (13)	0.18	0.559	0.488	0.591
Molybdenum cofactor biosynthesis	HumanCyc	0		4 (4)	1	1	1	6083	13 (13)	0.18	0.559	0.488	0.591
Folate polyglutamylation	HumanCyc	0		5 (5)	1	1	1	750	13 (13)	0.18	0.559	0.488	0.591
Estradiol biosynthesis I	HumanCyc	0		6 (6)	1	1	1	439153	13 (13)	0.18	0.559	0.488	0.591
Platelet activation - Homo sapiens (human)	KEGG	0		124 (124)	1	1	1	444899	13 (14)	0.18	0.559	0.488	0.591
Visual signal transduction: Cones	PID	0		23 (23)	1	1	1	10747814	13 (14)	0.18	0.559	0.488	0.591
Keratan sulfate/keratin metabolism	Reactome	0		33 (33)	1	1	1	6030	13 (19)	0.18	0.559	0.488	0.591
Beta oxidation of octanoyl-CoA to hexanoyl-CoA	Reactome	0		5 (5)	1	1	1	439153	13 (13)	0.18	0.559	0.488	0.591
Dopamine clearance from the synaptic cleft	Reactome	0		4 (4)	1	1	1	439155	13 (13)	0.18	0.559	0.488	0.591
Serotonin clearance from the synaptic cleft	Reactome	0		3 (3)	1	1	1	439153	13 (13)	0.18	0.559	0.488	0.591
N-glycan antennae elongation in the medial/trans-Golgi	Reactome	0		26 (26)	1	1	1	18950	13 (22)	0.18	0.559	0.488	0.591
Coenzyme A biosynthesis	Reactome	0		8 (8)	1	1	1	6083	13 (13)	0.18	0.559	0.488	0.591
Beta oxidation of palmitoyl-CoA to myristoyl-CoA	Reactome	0		3 (3)	1	1	1	439153	13 (13)	0.18	0.559	0.488	0.591
Beta oxidation of myristoyl-CoA to lauroyl-CoA	Reactome	0		3 (3)	1	1	1	439153	13 (13)	0.18	0.559	0.488	0.591
Beta oxidation of lauroyl-CoA to decanoyl-CoA-CoA	Reactome	0		5 (5)	1	1	1	439153	13 (13)	0.18	0.559	0.488	0.591
Beta oxidation of hexanoyl-CoA to butanoyl-CoA	Reactome	0		5 (5)	1	1	1	439153	13 (13)	0.18	0.559	0.488	0.591
Biosynthesis of E-series 18(R)-resolvins	Reactome	0		4 (4)	1	1	1	124886	13 (15)	0.18	0.559	0.488	0.591
ABC-family proteins mediated transport	Reactome	0		58 (58)	1	1	1	10747814	13 (20)	0.18	0.559	0.488	0.591
Transport of nucleotide sugars	Reactome	0		9 (9)	1	1	1	6030	13 (13)	0.18	0.559	0.488	0.591
DARPP-32 events	Reactome	0		26 (26)	1	1	1	6083	13 (13)	0.18	0.559	0.488	0.591
Sphingolipid pathway	Wikipathways	0		28 (28)	1	1	1	6453725	13 (14)	0.18	0.559	0.488	0.591
2-oxobutanoate degradation	HumanCyc	0		8 (8)	1	1	1	439153	14 (14)	0.192	0.588	0.509	0.606
Pyridoxal 5_-phosphate salvage	HumanCyc	0		5 (5)	1	1	1	1053	14 (14)	0.192	0.588	0.509	0.606
Pyrimidine ribonucleosides degradation	HumanCyc	0		6 (6)	1	1	1	439236	14 (14)	0.192	0.588	0.509	0.606
Androgen biosynthesis	HumanCyc	0		7 (7)	1	1	1	439153	14 (15)	0.192	0.588	0.509	0.606
NAD biosynthesis from 2-amino-3-carboxymuconate semialdehyde	HumanCyc	0		5 (5)	1	1	1	6083	14 (14)	0.192	0.588	0.509	0.606
Fructose and mannose metabolism - Homo sapiens (human)	KEGG	0		33 (33)	1	1	2	18950;79025	53 (54)	0.191	0.588	0.506	0.606
Cytokine Signaling in Immune system	Reactome	0		471 (471)	1	1	1	6083	14 (21)	0.192	0.588	0.509	0.606
Selenocysteine synthesis	Reactome	0		103 (103)	1	1	1	6083	14 (20)	0.192	0.588	0.509	0.606
Class I MHC mediated antigen processing & presentation	Reactome	0		316 (316)	1	1	1	6083	14 (21)	0.192	0.588	0.509	0.606
Fatty acids	Reactome	0		15 (15)	1	1	1	444899	14 (14)	0.192	0.588	0.509	0.606
Mineralocorticoid biosynthesis	Reactome	0		4 (4)	1	1	1	439153	14 (14)	0.192	0.588	0.509	0.606
Plasma lipoprotein assembly_ remodeling_ and clearance	Reactome	0		60 (60)	1	1	1	10747814	14 (21)	0.192	0.588	0.509	0.606
Activation of NMDA receptors and postsynaptic events	Reactome	0		75 (75)	1	1	1	750	14 (17)	0.192	0.588	0.509	0.606
Beta Oxidation of Very Long Chain Fatty Acids	SMPDB	0		10 (10)	1	1	1	10917	14 (14)	0.192	0.588	0.509	0.606
Plasmalogen Synthesis	SMPDB	0		5 (5)	1	1	1	5281	14 (14)	0.192	0.588	0.509	0.606
Etoposide Metabolism Pathway	SMPDB	0		19 (19)	1	1	1	439153	14 (14)	0.192	0.588	0.509	0.606
Glucuronidation	Wikipathways	0		26 (26)	1	1	1	439153	14 (14)	0.192	0.588	0.509	0.606
Metabolism of alpha-linolenic acid	Wikipathways	0		0 (0)	1	1	1	444899	15 (17)	0.204	0.618	0.204	0.618
Amino sugar and nucleotide sugar metabolism - Homo sapiens (human)	KEGG	0		48 (48)	1	1	3	18950;444791;79025	102 (108)	0.199	0.61	0.521	0.619
UTP and CTP dephosphorylation I	HumanCyc	0		3 (3)	1	1	1	6030	15 (15)	0.204	0.618	0.529	0.622
Serotonin and melatonin biosynthesis	HumanCyc	0		5 (5)	1	1	1	439155	15 (15)	0.204	0.618	0.529	0.622
Tryptophan degradation X (mammalian_ via tryptamine)	HumanCyc	0		4 (4)	1	1	1	439153	15 (15)	0.204	0.618	0.529	0.622
Putrescine degradation III	HumanCyc	0		10 (10)	1	1	1	439153	15 (15)	0.204	0.618	0.529	0.622
Biotin metabolism - Homo sapiens (human)	KEGG	0		3 (3)	1	1	1	1176	15 (28)	0.204	0.618	0.529	0.622
HIF-1 signaling pathway - Homo sapiens (human)	KEGG	0		109 (109)	1	1	1	51	15 (15)	0.204	0.618	0.529	0.622
Aquaporin-mediated transport	Reactome	0		49 (49)	1	1	1	1176	15 (15)	0.204	0.618	0.529	0.622
Synthesis of epoxy (EET) and dihydroxyeicosatrienoic acids (DHET)	Reactome	0		8 (8)	1	1	1	444899	15 (15)	0.204	0.618	0.529	0.622
Beta oxidation of decanoyl-CoA to octanoyl-CoA-CoA	Reactome	0		6 (6)	1	1	1	439153	15 (15)	0.204	0.618	0.529	0.622
Organic anion transporters	Reactome	0		10 (10)	1	1	1	938	15 (15)	0.204	0.618	0.529	0.622
Digestion of dietary lipid	Reactome	0		7 (7)	1	1	1	985	15 (17)	0.204	0.618	0.529	0.622
PIP3 activates AKT signaling	Reactome	0		218 (218)	1	1	1	936	15 (21)	0.204	0.618	0.529	0.622
Fructose catabolism	Reactome	0		5 (5)	1	1	1	439153	15 (15)	0.204	0.618	0.529	0.622
VEGFR2 mediated vascular permeability	Reactome	0		28 (28)	1	1	1	9750	15 (16)	0.204	0.618	0.529	0.622
Pentose and glucuronate interconversions - Homo sapiens (human)	KEGG	0		34 (34)	1	1	2	444791;51	56 (58)	0.207	0.625	0.533	0.626
Catecholamine biosynthesis	HumanCyc	0		4 (4)	1	1	1	439155	16 (16)	0.217	0.643	0.548	0.633
Serotonin degradation	HumanCyc	0		14 (14)	1	1	1	439153	16 (20)	0.217	0.643	0.548	0.633
Inosine-5-phosphate biosynthesis	HumanCyc	0		3 (3)	1	1	1	5960	16 (16)	0.217	0.643	0.548	0.633
Ascorbate and aldarate metabolism - Homo sapiens (human)	KEGG	0		30 (30)	1	1	2	444791;51	57 (57)	0.213	0.642	0.542	0.633
Insulin resistance - Homo sapiens (human)	KEGG	0		108 (108)	1	1	1	69507	16 (20)	0.217	0.643	0.548	0.633
Vascular smooth muscle contraction - Homo sapiens (human)	KEGG	0		133 (133)	1	1	1	444899	16 (16)	0.217	0.643	0.548	0.633
Scavenging by Class A Receptors	Reactome	0		19 (19)	1	1	1	18950	16 (32)	0.217	0.643	0.548	0.633
Digestion of dietary carbohydrate	Reactome	0		10 (10)	1	1	1	79025	16 (17)	0.217	0.643	0.548	0.633
Synthesis of bile acids and bile salts via 27-hydroxycholesterol	Reactome	0		11 (11)	1	1	1	439153	16 (16)	0.217	0.643	0.548	0.633
PI Metabolism	Reactome	0		84 (84)	1	1	1	10747814	16 (29)	0.217	0.643	0.548	0.633
Androgen biosynthesis	Reactome	0		8 (8)	1	1	1	439153	16 (16)	0.217	0.643	0.548	0.633
Wax and plasmalogen biosynthesis	Reactome	0		7 (7)	1	1	1	985	16 (18)	0.217	0.643	0.548	0.633
Serotonin and melatonin biosynthesis	Reactome	0		5 (5)	1	1	1	439155	16 (16)	0.217	0.643	0.548	0.633
Mycophenolic Acid Metabolism Pathway	SMPDB	0		16 (16)	1	1	1	439153	16 (16)	0.217	0.643	0.548	0.633
Thiamine metabolic pathways	Wikipathways	0		8 (8)	1	1	1	51	16 (21)	0.217	0.643	0.548	0.633
Regucalcin in proximal tubule epithelial kidney cells	Wikipathways	0		20 (20)	1	1	1	6083	16 (22)	0.217	0.643	0.548	0.633
RAS and bradykinin pathways in COVID-19	Wikipathways	0		28 (28)	1	1	1	444899	16 (16)	0.217	0.643	0.548	0.633
Heme Biosynthesis	Wikipathways	0		9 (9)	1	1	1	750	16 (16)	0.217	0.643	0.548	0.633
Vitamin B6 (pyridoxine) metabolism	EHMN	0		0 (0)	1	1	1	1053	16 (16)	0.217	0.643	0.217	0.643
Tyrosine Metabolism	Wikipathways	0		0 (0)	1	1	1	9378	16 (17)	0.217	0.643	0.217	0.643
5-aminoimidazole ribonucleotide biosynthesis	HumanCyc	0		3 (3)	1	1	1	750	17 (17)	0.228	0.673	0.566	0.649
Renin secretion - Homo sapiens (human)	KEGG	0		69 (69)	1	1	1	6083	17 (17)	0.228	0.673	0.566	0.649
RA biosynthesis pathway	Reactome	0		22 (22)	1	1	1	439153	17 (17)	0.228	0.673	0.566	0.649
Methionine salvage pathway	Reactome	0		6 (6)	1	1	1	190	17 (19)	0.228	0.673	0.566	0.649
Glucocorticoid biosynthesis	Reactome	0		9 (9)	1	1	1	439153	17 (17)	0.228	0.673	0.566	0.649
Molybdenum cofactor biosynthesis	Reactome	0		6 (6)	1	1	1	6083	17 (19)	0.228	0.673	0.566	0.649
Vitamin B5 (pantothenate) metabolism	Reactome	0		14 (14)	1	1	1	6083	17 (17)	0.228	0.673	0.566	0.649
Kennedy pathway from sphingolipids	Wikipathways	0		14 (14)	1	1	1	439155	17 (18)	0.228	0.673	0.566	0.649
Mitochondrial Fatty Acid Beta-Oxidation	Reactome	0		36 (37)	1	1	2	6083;439153	60 (66)	0.229	0.676	0.567	0.65
Synthesis of substrates in N-glycan biosythesis	Reactome	0		63 (63)	1	1	2	6030;69507	61 (69)	0.235	0.692	0.575	0.659
Heme biosynthesis	HumanCyc	0		9 (9)	1	1	1	750	18 (18)	0.24	0.7	0.583	0.661
Inositol phosphate metabolism	INOH	0		41 (41)	1	1	1	444791	18 (25)	0.24	0.7	0.583	0.661
Metabolism of ingested H2SeO4 and H2SeO3 into H2Se	Reactome	0		4 (4)	1	1	1	124886	18 (19)	0.24	0.7	0.583	0.661
Vitamins B6 activation to pyridoxal phosphate	Reactome	0		3 (3)	1	1	1	1053	18 (18)	0.24	0.7	0.583	0.661
RAS processing	Reactome	0		23 (23)	1	1	1	439155	18 (19)	0.24	0.7	0.583	0.661
Inactivation_ recovery and regulation of the phototransduction cascade	Reactome	0		36 (36)	1	1	1	439155	18 (18)	0.24	0.7	0.583	0.661
Glycolysis and Gluconeogenesis	Wikipathways	0		45 (45)	1	1	1	5960	18 (18)	0.24	0.7	0.583	0.661
Biogenic Amine Synthesis	Wikipathways	0		15 (15)	1	1	1	6274	18 (18)	0.24	0.7	0.583	0.661
Heme degradation	Reactome	0		17 (17)	1	1	1	444791	19 (19)	0.252	0.729	0.599	0.674
Synthesis of IP2_ IP_ and Ins in the cytosol	Reactome	0		14 (14)	1	1	1	444791	19 (19)	0.252	0.729	0.599	0.674
Catecholamine biosynthesis	Reactome	0		4 (4)	1	1	1	439155	19 (19)	0.252	0.729	0.599	0.674
Lactose Synthesis	SMPDB	0		11 (11)	1	1	1	6030	19 (19)	0.252	0.729	0.599	0.674
Ubiquinone Biosynthesis	SMPDB	0		5 (5)	1	1	1	439155	19 (19)	0.252	0.729	0.599	0.674
Thermogenesis	Wikipathways	0		108 (108)	1	1	1	439153	19 (25)	0.252	0.729	0.599	0.674
Ceramide de novo biosynthesis	HumanCyc	0		7 (7)	1	1	1	439153	20 (20)	0.263	0.752	0.614	0.683
Nicotine degradation IV	HumanCyc	0		17 (17)	1	1	1	439155	20 (28)	0.263	0.752	0.614	0.683
Riboflavin metabolism - Homo sapiens (human)	KEGG	0		8 (8)	1	1	1	493570	20 (20)	0.263	0.752	0.614	0.683
Metabolism of polyamines	Reactome	0		13 (13)	1	1	1	6262	20 (20)	0.263	0.752	0.614	0.683
Binding and Uptake of Ligands by Scavenger Receptors	Reactome	0		42 (42)	1	1	1	18950	20 (41)	0.263	0.752	0.614	0.683
Synthesis of Lipoxins (LX)	Reactome	0		6 (6)	1	1	1	439153	20 (20)	0.263	0.752	0.614	0.683
Biosynthesis of the N-glycan precursor (dolichol lipid-linked oligosaccharide_ LLO) and transfer to a nascent protein	Reactome	0		77 (77)	1	1	2	6030;69507	66 (82)	0.263	0.752	0.615	0.683
Pterine Biosynthesis	SMPDB	0		9 (9)	1	1	1	439153	20 (20)	0.263	0.752	0.614	0.683
Vitamin B6 Metabolism	SMPDB	0		5 (5)	1	1	1	1053	20 (20)	0.263	0.752	0.614	0.683
Vitamin B5 - CoA biosynthesis from pantothenate	EHMN	0		31 (31)	1	1	1	6083	21 (21)	0.274	0.776	0.629	0.693
Ubiquinol-10 biosynthesis	HumanCyc	0		7 (7)	1	1	1	439155	21 (21)	0.274	0.776	0.629	0.693
Cholesterol biosynthesis II (via 24_25-dihydrolanosterol)	HumanCyc	0		13 (13)	1	1	1	439153	21 (32)	0.274	0.776	0.629	0.693
Thyroid hormone synthesis - Homo sapiens (human)	KEGG	0		75 (75)	1	1	1	124886	21 (21)	0.274	0.776	0.629	0.693
The phototransduction cascade	Reactome	0		37 (37)	1	1	1	439155	21 (22)	0.274	0.776	0.629	0.693
Beta-oxidation of pristanoyl-CoA	Reactome	0		9 (9)	1	1	1	439153	21 (21)	0.274	0.776	0.629	0.693
Beta-oxidation of very long chain fatty acids	Reactome	0		12 (12)	1	1	1	439153	21 (26)	0.274	0.776	0.629	0.693
Synthesis of UDP-N-acetyl-glucosamine	Reactome	0		8 (8)	1	1	1	69507	21 (21)	0.274	0.776	0.629	0.693
Pantothenate and CoA Biosynthesis	SMPDB	0		6 (6)	1	1	1	6083	21 (21)	0.274	0.776	0.629	0.693
Cannabinoid receptor signaling	Wikipathways	0		20 (20)	1	1	1	444899	21 (23)	0.274	0.776	0.629	0.693
Eicosanoid Synthesis	Wikipathways	0		23 (23)	1	1	1	444899	21 (23)	0.274	0.776	0.629	0.693
Tryptophan degradation	HumanCyc	0		9 (9)	1	1	1	439153	22 (22)	0.285	0.802	0.643	0.703
Taurine and hypotaurine metabolism - Homo sapiens (human)	KEGG	0		11 (11)	1	1	1	51	22 (22)	0.285	0.802	0.643	0.703
Detoxification of Reactive Oxygen Species	Reactome	0		35 (35)	1	1	1	124886	22 (24)	0.285	0.802	0.643	0.703
Ubiquinol biosynthesis	Reactome	0		8 (8)	1	1	1	439155	22 (22)	0.285	0.802	0.643	0.703
Transfer of Acetyl Groups into Mitochondria	SMPDB	0		9 (9)	1	1	1	439153	22 (22)	0.285	0.802	0.643	0.703
Nicotine Metabolism Pathway	SMPDB	0		9 (9)	1	1	1	439153	22 (22)	0.285	0.802	0.643	0.703
Platelet activation_ signaling and aggregation	Reactome	0		263 (263)	1	1	1	444899	23 (28)	0.296	0.831	0.656	0.717
Biopterin metabolism	EHMN	0		15 (15)	1	1	1	439153	24 (24)	0.307	0.855	0.669	0.725
Vitamin A (retinol) metabolism	EHMN	0		26 (26)	1	1	1	439153	24 (28)	0.307	0.855	0.669	0.725
Cholesterol biosynthesis III (via desmosterol)	HumanCyc	0		13 (13)	1	1	1	439153	24 (32)	0.307	0.855	0.669	0.725
Cholesterol biosynthesis I	HumanCyc	0		13 (13)	1	1	1	439153	24 (32)	0.307	0.855	0.669	0.725
NAD de novo biosynthesis	HumanCyc	0		12 (12)	1	1	1	6083	24 (24)	0.307	0.855	0.669	0.725
Ovarian steroidogenesis - Homo sapiens (human)	KEGG	0		51 (51)	1	1	1	444899	24 (24)	0.307	0.855	0.669	0.725
VEGFA-VEGFR2 Pathway	Reactome	0		92 (92)	1	1	1	9750	24 (26)	0.307	0.855	0.669	0.725
Signaling by VEGF	Reactome	0		100 (100)	1	1	1	9750	24 (26)	0.307	0.855	0.669	0.725
Phosphate bond hydrolysis by NUDT proteins	Reactome	0		7 (7)	1	1	1	6083	24 (24)	0.307	0.855	0.669	0.725
Arachidonic acid metabolism - Homo sapiens (human)	KEGG	0		61 (61)	1	1	2	444899;10747814	75 (75)	0.314	0.875	0.678	0.734
G alpha (s) signalling events	Reactome	0		143 (143)	1	1	1	6083	25 (25)	0.317	0.883	0.682	0.737
Thiamine metabolism - Homo sapiens (human)	KEGG	0		15 (16)	1	1	1	750	26 (31)	0.328	0.908	0.693	0.747
Platelet homeostasis	Reactome	0		85 (85)	1	1	1	9750	26 (28)	0.328	0.908	0.693	0.747
Inositol Metabolism	SMPDB	0		22 (22)	1	1	1	444791	26 (31)	0.328	0.908	0.693	0.747
Biosynthesis of electrophilic ?-3 PUFA oxo-derivatives	Reactome	0		2 (2)	1	1	1	446284	27 (28)	0.338	0.935	0.705	0.758
Pantothenate and CoA biosynthesis - Homo sapiens (human)	KEGG	0		21 (21)	1	1	1	5960	28 (30)	0.348	0.96	0.715	0.767
Folate Metabolism	SMPDB	0		13 (13)	1	1	1	439153	28 (28)	0.348	0.96	0.715	0.767
Selenoamino Acid Metabolism	SMPDB	0		12 (12)	1	1	1	6083	28 (28)	0.348	0.96	0.715	0.767
Vitamin B6 metabolism - Homo sapiens (human)	KEGG	0		6 (6)	1	1	1	1053	29 (29)	0.358	0.984	0.726	0.776
Fatty acid elongation - Homo sapiens (human)	KEGG	0		27 (27)	1	1	1	985	29 (40)	0.358	0.984	0.726	0.776
Glycolysis / Gluconeogenesis - Homo sapiens (human)	KEGG	0		67 (67)	1	1	1	79025	29 (31)	0.358	0.984	0.726	0.776
Metabolism of steroids	Reactome	0		124 (124)	1	1	3	6083;439153;750	141 (142)	0.359	0.988	0.727	0.777
Triacylglycerol biosynthesis	HumanCyc	0		27 (27)	1	1	1	10747814	30 (43)	0.368	1	0.736	0.785
Pyruvate metabolism - Homo sapiens (human)	KEGG	0		47 (47)	1	1	1	1110	30 (32)	0.368	1	0.736	0.785
Heme biosynthesis	Reactome	0		14 (14)	1	1	1	750	31 (33)	0.377	1	0.745	0.789
Amino Sugar Metabolism	SMPDB	0		17 (17)	1	1	1	69507	31 (32)	0.377	1	0.745	0.789
Nicotine Action Pathway	SMPDB	0		36 (36)	1	1	1	439153	31 (31)	0.377	1	0.745	0.789
Selenoamino acid metabolism	EHMN	0		36 (36)	1	1	1	6083	32 (38)	0.387	1	0.754	0.794
Glutathione redox reactions I	HumanCyc	0		9 (9)	1	1	2	124886;10747814	88 (100)	0.386	1	0.753	0.794
Aminosugars metabolism	INOH	0		20 (20)	1	1	1	69507	32 (32)	0.387	1	0.754	0.794
Sulfur metabolism - Homo sapiens (human)	KEGG	0		10 (10)	1	1	1	1110	32 (33)	0.387	1	0.754	0.794
Androgen and Estrogen Metabolism	SMPDB	0		12 (12)	1	1	1	439153	32 (32)	0.387	1	0.754	0.794
Fatty acid beta-oxidation	Wikipathways	0		34 (34)	1	1	1	743	32 (34)	0.387	1	0.754	0.794
Starch and sucrose metabolism - Homo sapiens (human)	KEGG	0		36 (36)	1	1	1	69507	33 (37)	0.396	1	0.763	0.802
Taste transduction - Homo sapiens (human)	KEGG	0		86 (86)	1	1	1	6083	33 (33)	0.396	1	0.763	0.802
Superpathway of steroid hormone biosynthesis	HumanCyc	0		17 (17)	1	1	1	439153	34 (35)	0.405	1	0.771	0.81
Inflammatory mediator regulation of TRP channels - Homo sapiens (human)	KEGG	0		98 (98)	1	1	1	444899	34 (35)	0.405	1	0.771	0.81
Organic cation/anion/zwitterion transport	Reactome	0		13 (13)	1	1	1	51	34 (35)	0.405	1	0.771	0.81
Xenobiotics metabolism	EHMN	0		51 (51)	1	1	2	439153;124886	93 (93)	0.412	1	0.778	0.816
Pentose phosphate pathway - Homo sapiens (human)	KEGG	0		30 (30)	1	1	1	439236	35 (35)	0.414	1	0.779	0.816
Metabolism of steroid hormones	Reactome	0		31 (31)	1	1	1	439153	35 (35)	0.414	1	0.779	0.816
Valine_ leucine and isoleucine degradation - Homo sapiens (human)	KEGG	0		48 (48)	1	1	1	69362	36 (42)	0.423	1	0.787	0.823
Adaptive Immune System	Reactome	0		719 (719)	1	1	1	6083	36 (51)	0.423	1	0.787	0.823
Bile secretion - Homo sapiens (human)	KEGG	0		90 (90)	1	1	3	10917;124886;51	157 (161)	0.425	1	0.789	0.825
Phosphatidylinositol phosphate metabolism	EHMN	0		93 (93)	1	1	1	444791	38 (48)	0.441	1	0.802	0.836
Inositol phosphate metabolism - Homo sapiens (human)	KEGG	0		73 (73)	1	1	1	444791	38 (47)	0.441	1	0.802	0.836
Pyrimidine metabolism	Wikipathways	0		84 (84)	1	1	1	6030	38 (40)	0.441	1	0.802	0.836
Aminosugars metabolism	EHMN	0		51 (51)	1	1	1	69507	39 (43)	0.449	1	0.809	0.839
Metabolism of amine-derived hormones	Reactome	0		16 (16)	1	1	1	439155	39 (39)	0.449	1	0.809	0.839
Sphingolipid Metabolism	SMPDB	0		22 (22)	1	1	1	10747814	39 (40)	0.449	1	0.809	0.839
Squalene and cholesterol biosynthesis	EHMN	0		37 (37)	1	1	1	439153	40 (42)	0.458	1	0.815	0.845
Serotonergic synapse - Homo sapiens (human)	KEGG	0		113 (115)	1	1	1	444899	42 (42)	0.474	1	0.828	0.85
Inositol phosphate metabolism	Reactome	0		51 (51)	1	1	1	444791	42 (44)	0.474	1	0.828	0.85
Superpathway of cholesterol biosynthesis	HumanCyc	0		25 (25)	1	1	1	439153	43 (62)	0.482	1	0.834	0.856
alpha-Linolenic acid metabolism - Homo sapiens (human)	KEGG	0		25 (25)	1	1	1	10747814	44 (44)	0.49	1	0.839	0.861
Propanoate metabolism - Homo sapiens (human)	KEGG	0		34 (34)	1	1	1	1110	45 (48)	0.498	1	0.845	0.862
Primary bile acid biosynthesis - Homo sapiens (human)	KEGG	0		17 (17)	1	1	1	750	47 (47)	0.513	1	0.855	0.862
Cholesterol biosynthesis	Reactome	0		25 (25)	1	1	1	439153	46 (46)	0.505	1	0.85	0.862
Cytosolic sulfonation of small molecules	Reactome	0		25 (25)	1	1	1	6083	47 (47)	0.513	1	0.855	0.862
Steroid Biosynthesis	SMPDB	0		22 (22)	1	1	1	985	46 (46)	0.505	1	0.85	0.862
Cytochrome P450 - arranged by substrate type	Reactome	0		57 (57)	1	1	2	301590;444899	117 (120)	0.532	1	0.868	0.874
Class C/3 (Metabotropic glutamate/pheromone receptors)	Reactome	0		40 (40)	1	1	1	6262	51 (54)	0.542	1	0.874	0.879
C21-steroid hormone biosynthesis and metabolism	EHMN	0		57 (57)	1	1	1	439153	52 (61)	0.549	1	0.878	0.882
Phosphonate and phosphinate metabolism - Homo sapiens (human)	KEGG	0		6 (6)	1	1	1	750	52 (56)	0.549	1	0.878	0.882
Serine Metabolism	Wikipathways	0		0 (0)	1	1	1	51	25 (27)	0.317	0.883	0.317	0.883
Chondroitin sulfate degradation (metazoa)	HumanCyc	0		7 (7)	1	1	2	79025;439236	122 (131)	0.555	1	0.882	0.885
Dermatan sulfate degradation (metazoa)	HumanCyc	0		7 (7)	1	1	2	79025;439236	122 (131)	0.555	1	0.882	0.885
Porphyrin and chlorophyll metabolism - Homo sapiens (human)	KEGG	0		42 (42)	1	1	2	750;6288	123 (143)	0.56	1	0.884	0.887
Phenylalanine metabolism - Homo sapiens (human)	KEGG	0		17 (17)	1	1	1	1110	60 (60)	0.601	1	0.907	0.909
Ubiquinone and other terpenoid-quinone biosynthesis - Homo sapiens (human)	KEGG	0		11 (11)	1	1	1	14985	70 (71)	0.658	1	0.934	0.935
Tyrosine metabolism - Homo sapiens (human)	KEGG	0		36 (36)	1	1	1	1110	76 (78)	0.689	1	0.946	0.946
Tryptophan metabolism - Homo sapiens (human)	KEGG	0		42 (42)	1	1	1	161166	83 (83)	0.721	1	0.957	0.957
Beta3 integrin cell surface interactions	PID	1	THY1	44 (44)	0.0163	1	0		0 (0)	1	1	0.0163	1
IL4-mediated signaling events	PID	1	THY1	65 (65)	0.024	1	0		0 (0)	1	1	0.024	1
